# Supplementary material
Source: Research Square preprint supplement (doi:10.21203/rs.3.rs-8618507/v1)
Supplement: Supplementary file 1 [file 43ce009866051c9f9e3e27f3.pdf]

- 1 Machine learning can improve the mapping of food consumption and
- 2 diet quality
- 3
- 4
- 5 Supplementary Information

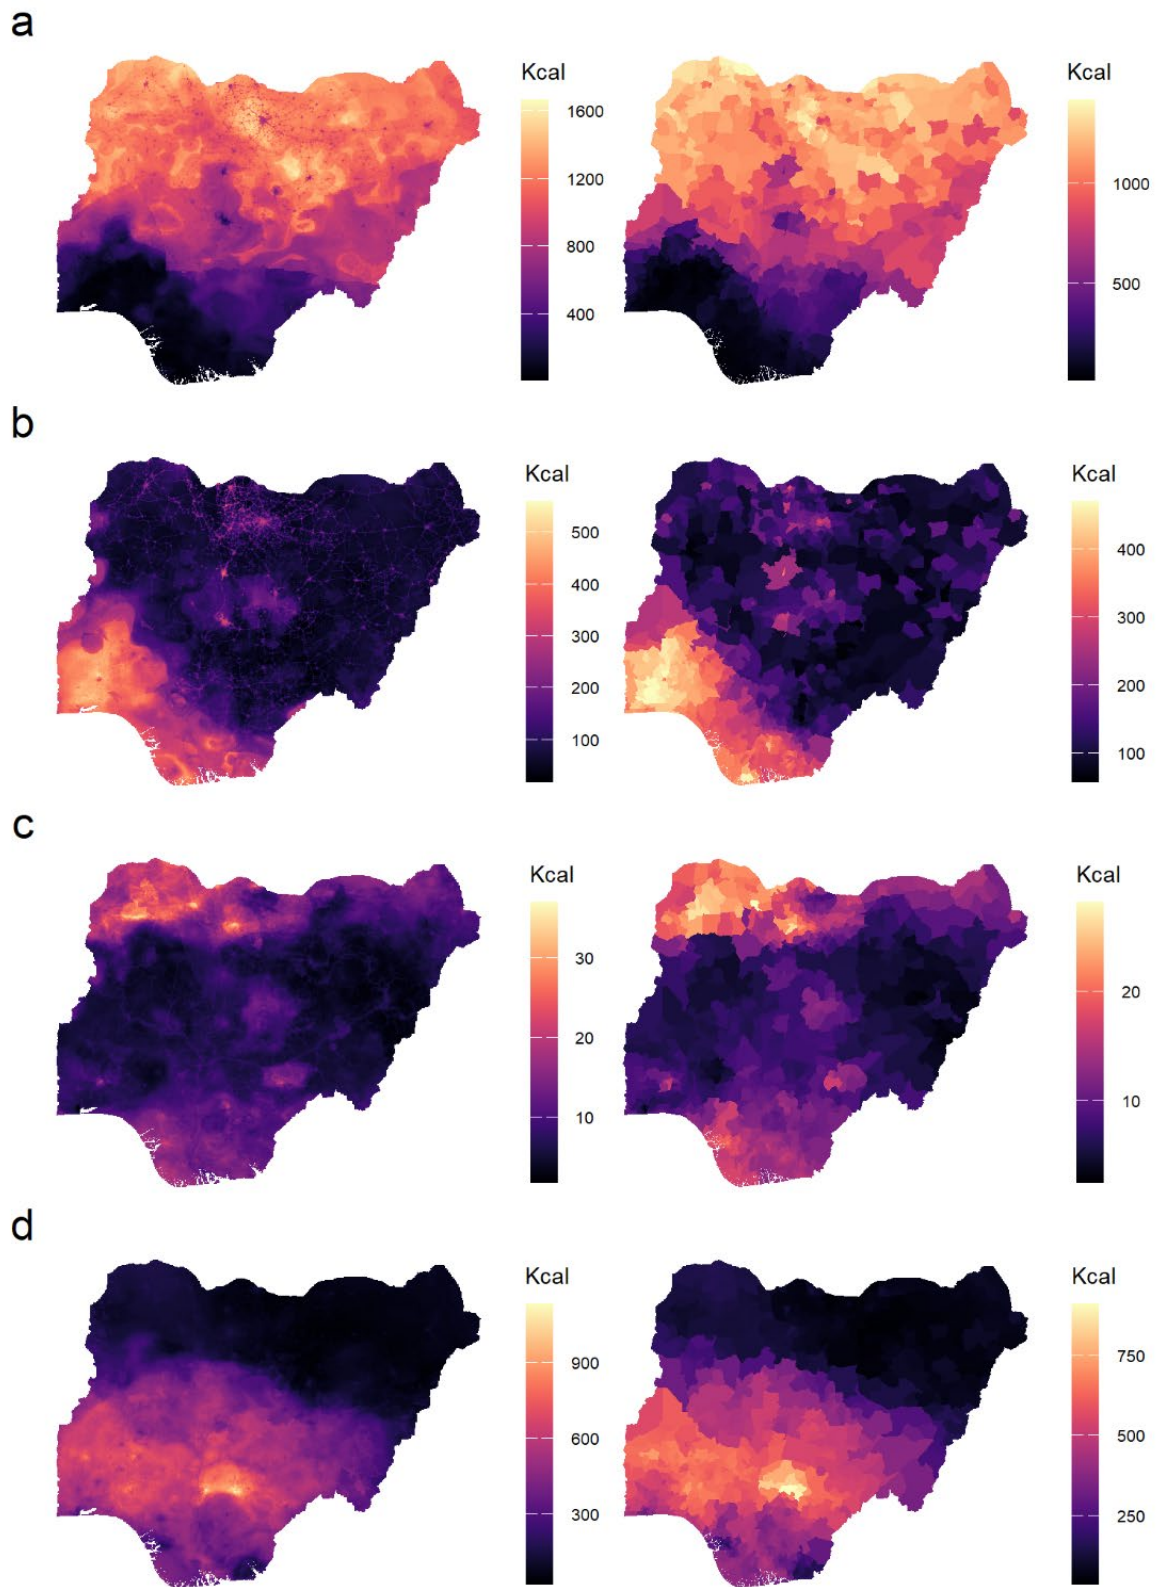

6

7 Supplementary Fig. 1: Predicted per capita daily food consumption (kcal) in adult female equivalent  
 8 (AFE) at 30 arcsecond grid level (**left**) and on local governmental area (LGA) level (right) for grains 1  
 9 (a), grains 2 (b), grains 3 (c), roots and tubers 1 (d).

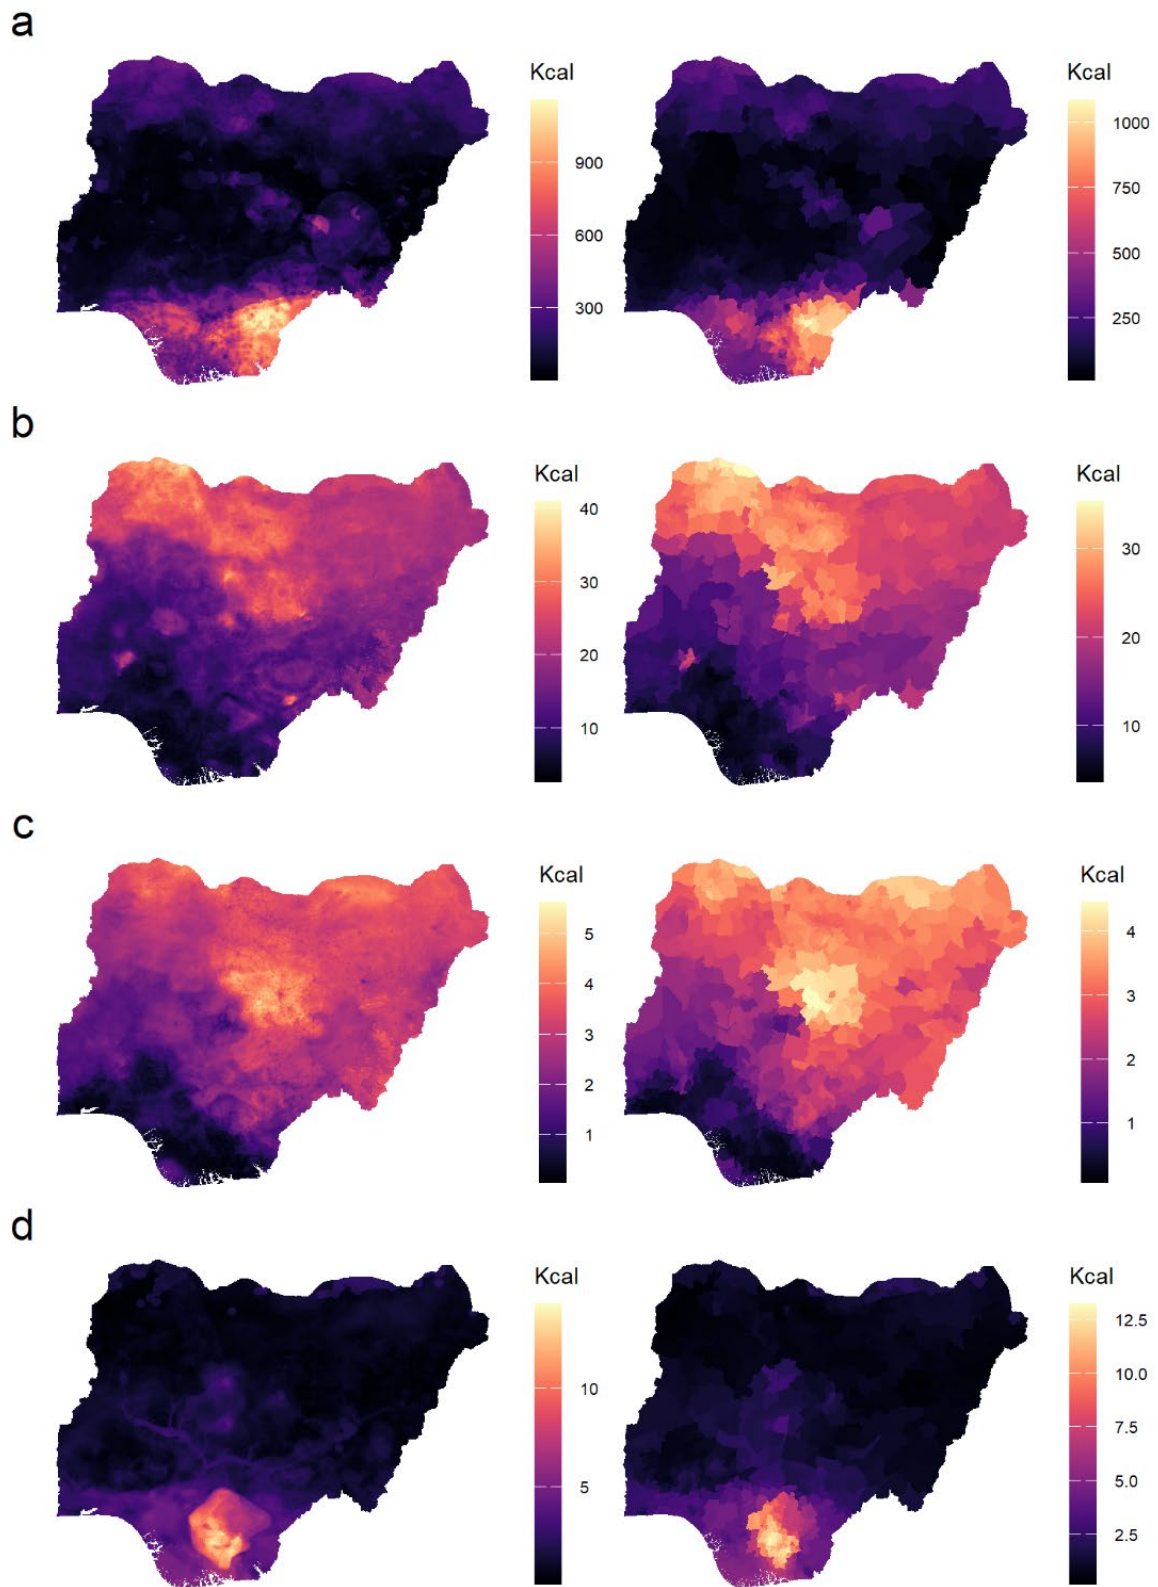

10  
 11 Supplementary Fig. 2: Predicted per capita daily food consumption (kcal) in adult female equivalent  
 12 (AFE) at 30 arcsecond grid level (**left**) and on local governmental area (LGA) level (**right**) for roots and  
 13 tubers 2 (**a**), roots and tubers 3 (**b**), vegetables 1 (**c**), vegetables 2 (**d**).

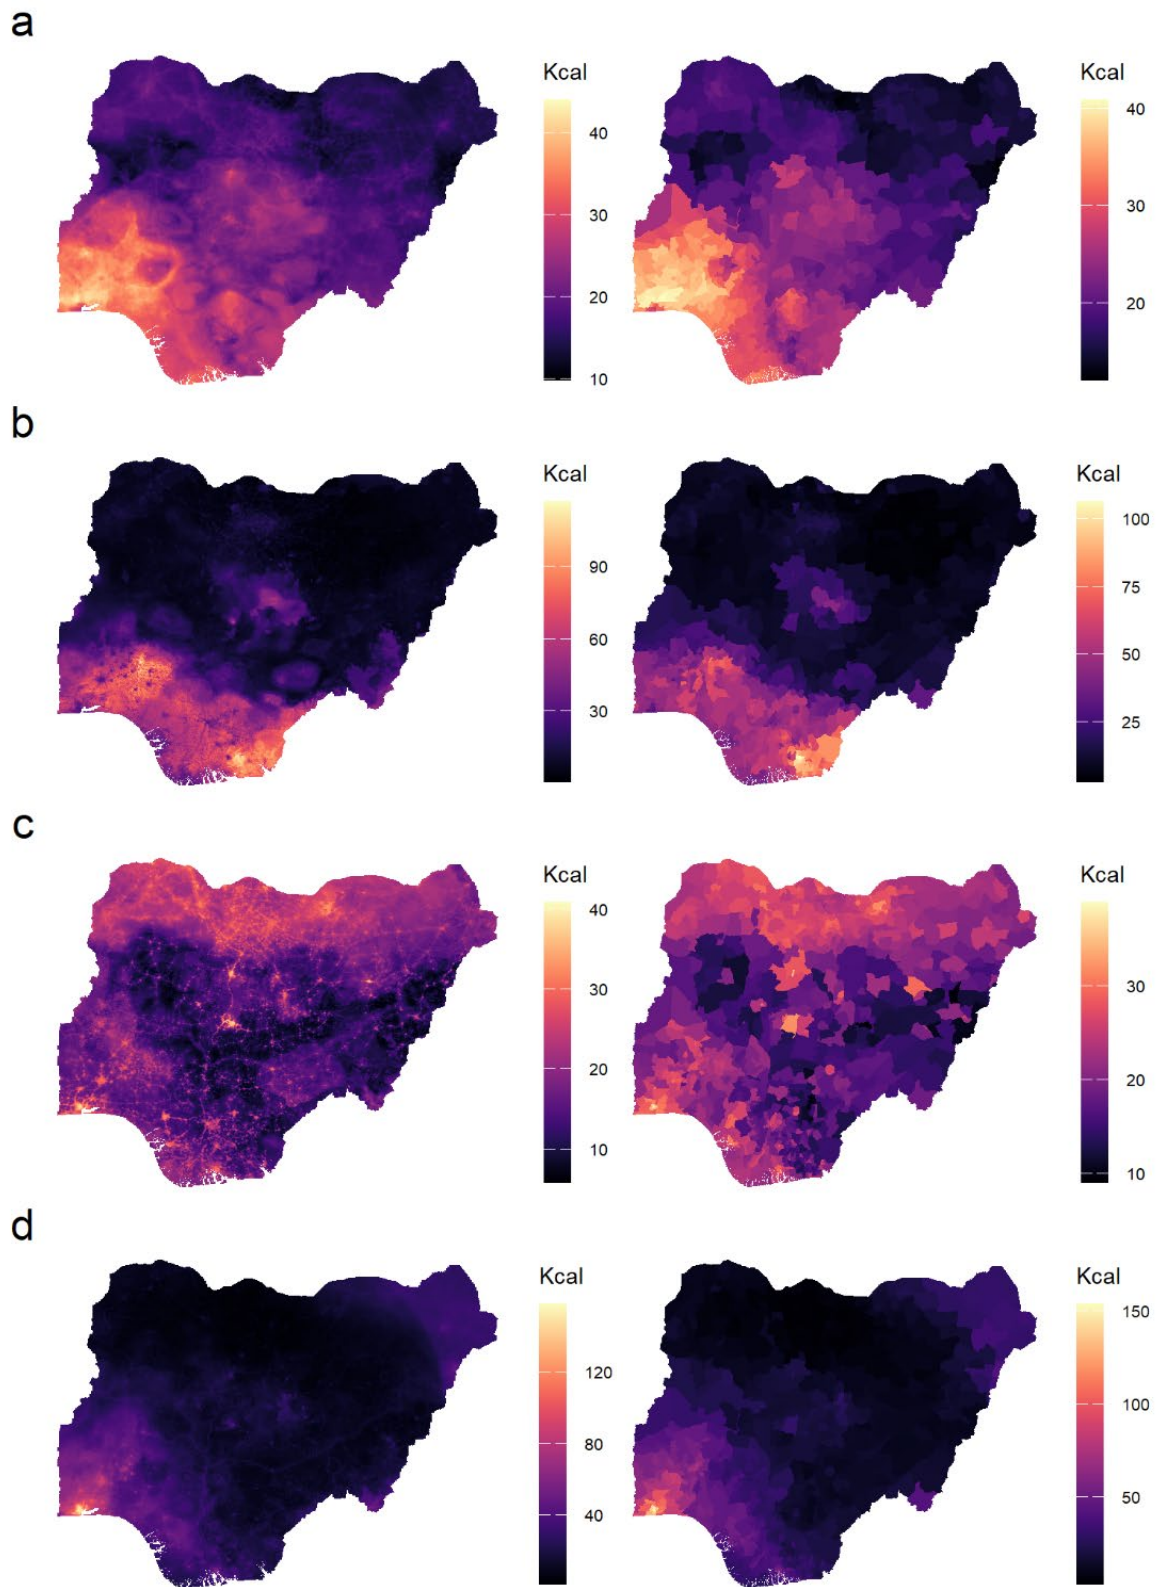

14  
 15 Supplementary Fig. 3: Predicted per capita daily food consumption (kcal) in adult female equivalent  
 16 (AFE) at 30 arcsecond grid level (**left**) and on local governmental area (LGA) level (**right**) for  
 17 vegetables 3 (**a**), fruits 1 (**b**), fruits 2 (**c**), legumes 1 (**d**).

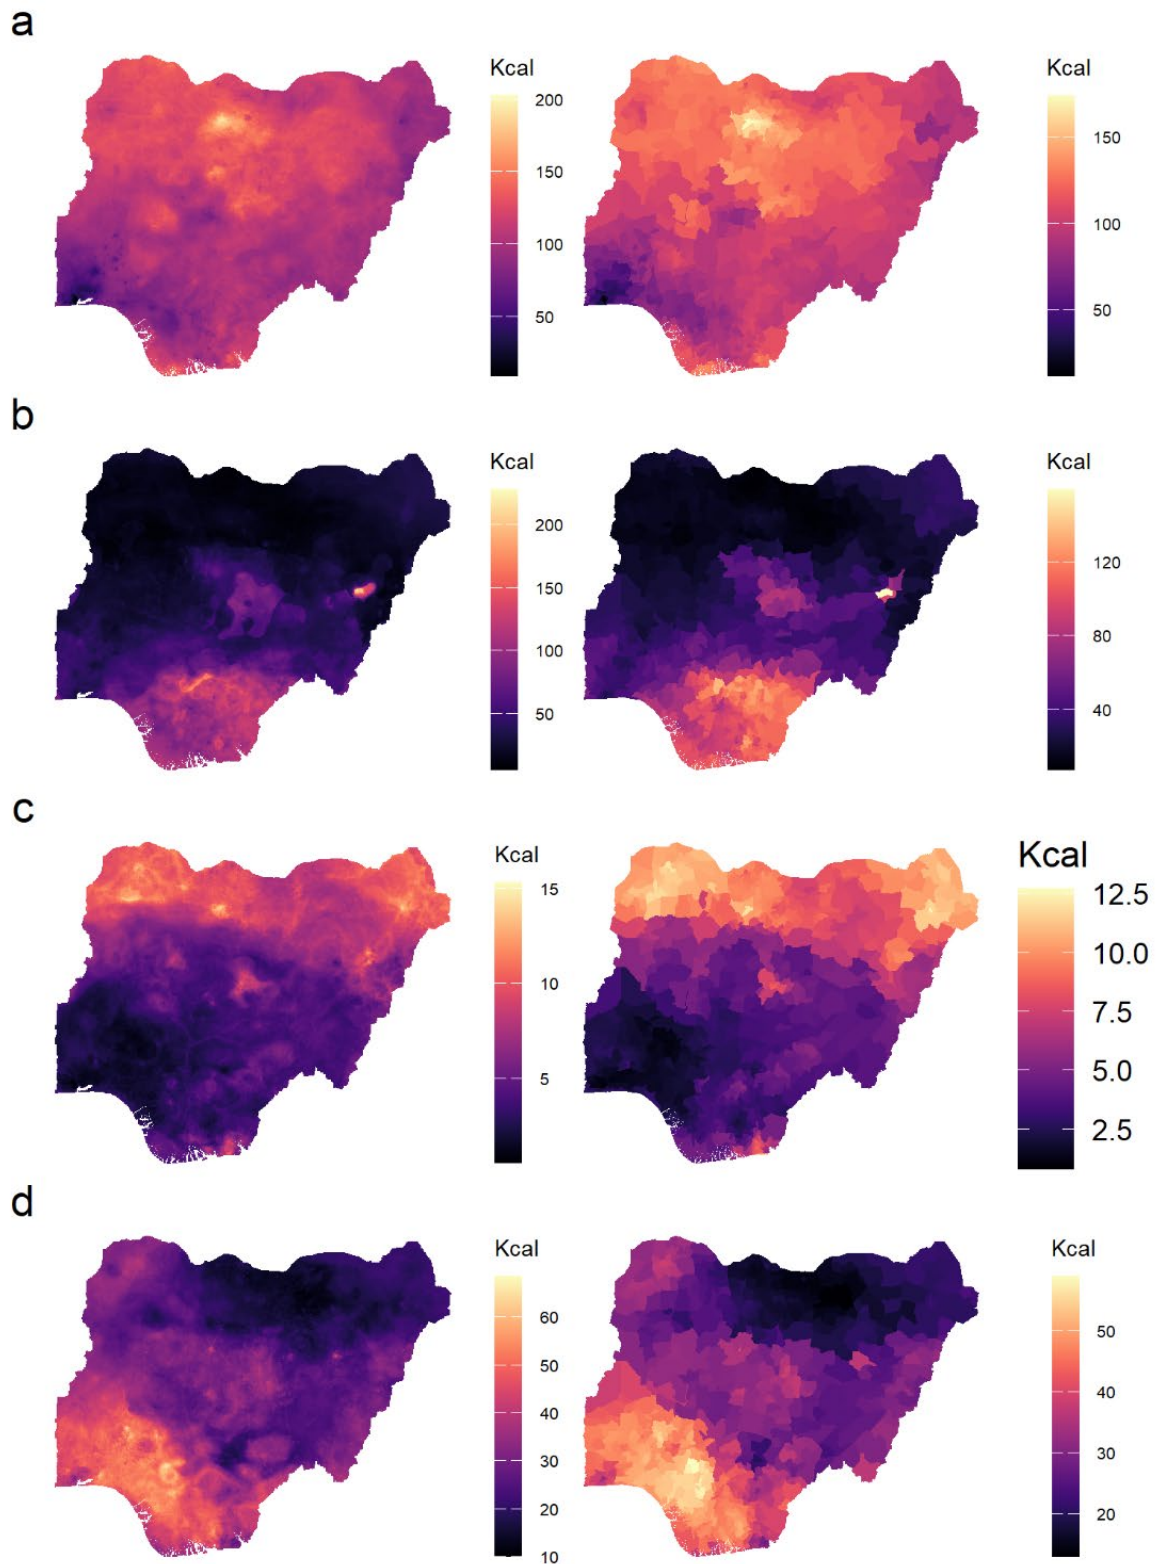

18  
 19 Supplementary Fig. 4: Predicted per capita daily food consumption (kcal) in adult female equivalent  
 20 (AFE) at 30 arcsecond grid level (**left**) and on local governmental area (LGA) level (**right**) for legumes 2  
 21 (a), nuts (b), red meat 1 (c), red meat 2 (d).

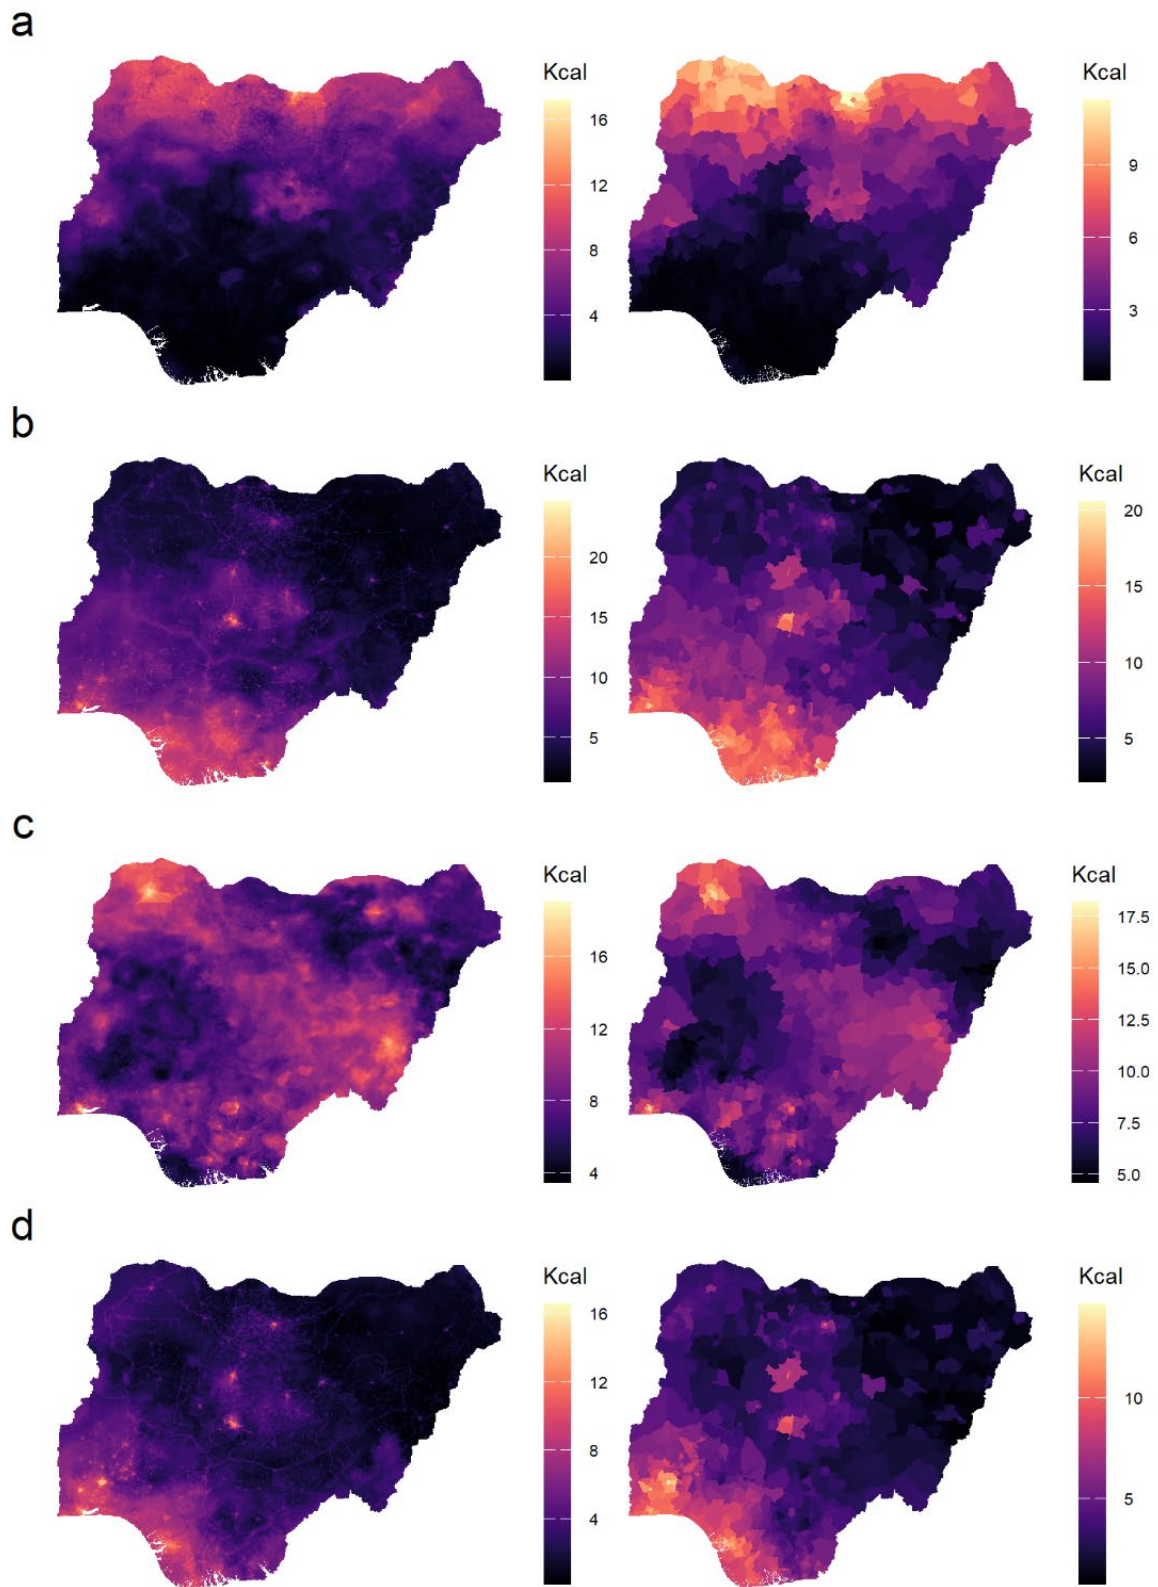

22

23 Supplementary Fig. 5: Predicted per capita daily food consumption (kcal) in adult female equivalent  
 24 (AFE) at 30 arcsecond grid level (**left**) and on local governmental area (LGA) level (**right**) for dairy 1  
 25 (a), dairy 2 (b), poultry (c), eggs (d).

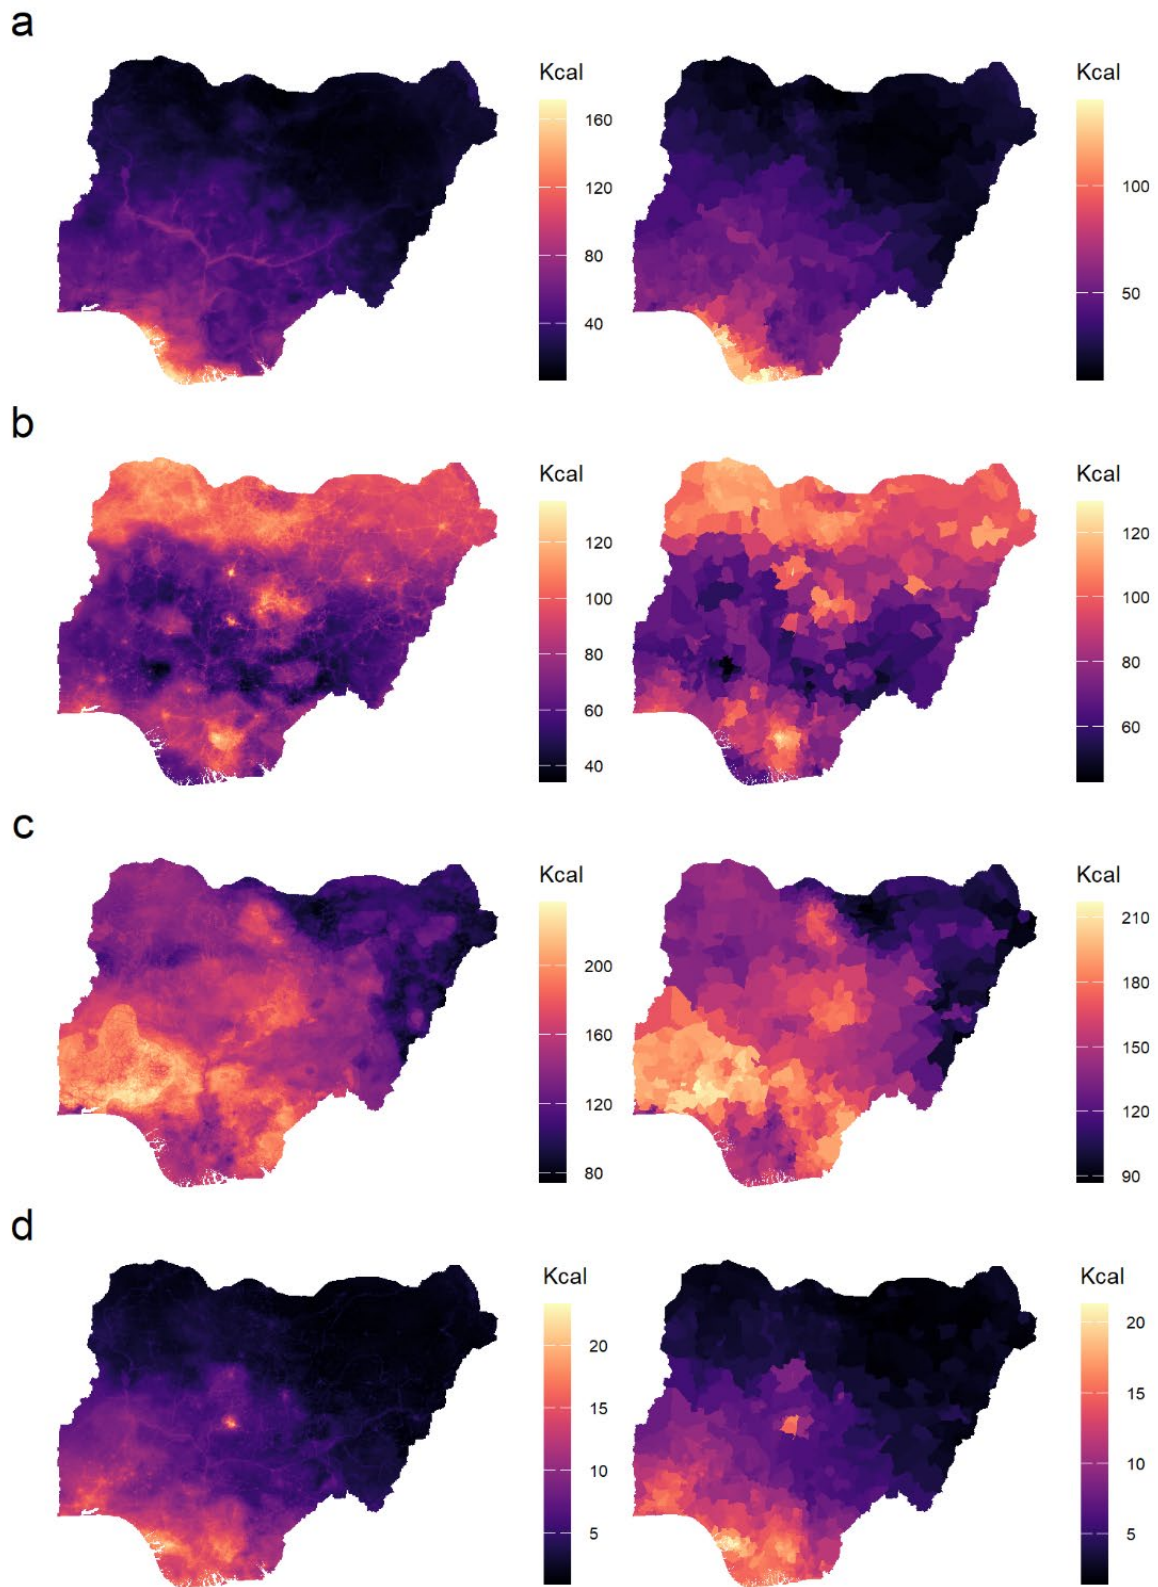

26

27 Supplementary Fig. 6: Predicted per capita daily food consumption (kcal) in adult female equivalent  
 28 (AFE) at 30 arcsecond grid level (**left**) and on local governmental area (LGA) level (**right**) for fish (a),  
 29 unsaturated oils (b), palm oil (c), sweeteners 1 (d).

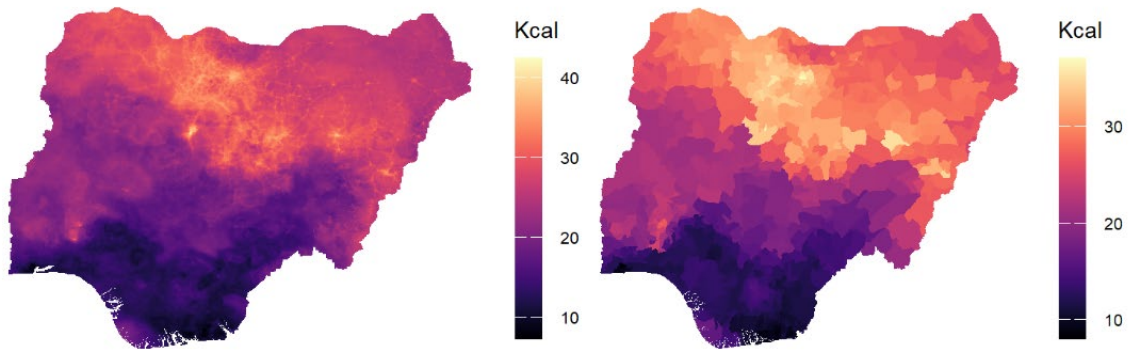

30

31 Supplementary Fig. 7: Predicted per capita daily food consumption (kcal) in adult female equivalent  
32 (AFE) at 30 arcsecond grid level (**left**) and on local governmental area (LGA) level (**right**) for  
33 sweeteners 2

34 Table 1: Mapping food items to food categories and food groups

| <b>Food item</b>             | <b>Food category</b> | <b>Food group</b>  |
|------------------------------|----------------------|--------------------|
| GUINEA CORN/SORGHUM          | Grains               | Grains 1           |
| MILLET                       | Grains               | Grains 1           |
| RICE - LOCAL                 | Grains               | Grains 1           |
| RICE - IMPORTED              | Grains               | Grains 2           |
| MAIZE FLOUR                  | Grains               | Grains 1           |
| YAM FLOUR                    | Roots and tubers     | Roots and tubers 1 |
| CASSAVA FLOUR                | Roots and tubers     | Roots and tubers 1 |
| WHEAT FLOUR                  | Grains               | Grains 2           |
| MAIZE (UNSHELLED/ON THE COB) | Grains               | Grains 3           |
| MAIZE (SHELLED/OFF THE COB)  | Grains               | Grains 1           |
| OTHER GRAINS AND FLOUR       | Grains               | Grains 2           |
| BREAD                        | Grains               | Grains 2           |
| CAKE                         | Grains               | Grains 3           |
| BUNS/POFPOF/DONUTS           | Grains               | Grains 3           |
| BISCUITS                     | Grains               | Grains 3           |
| MEAT PIE/SAUSAGE ROLL        | Grains               | Grains 3           |
| CASSAVA - ROOTS              | Roots and tubers     | Roots and tubers 2 |
| YAM - ROOTS                  | Roots and tubers     | Roots and tubers 1 |
| GARI - WHITE                 | Roots and tubers     | Roots and tubers 1 |
| GARI - YELLOW                | Roots and tubers     | Roots and tubers 2 |
| COCoyAM                      | Roots and tubers     | Roots and tubers 2 |
| PLANTAINS                    | Roots and tubers     | Roots and tubers 2 |
| SWEET POTATOES               | Roots and tubers     | Roots and tubers 3 |
| POTATOES                     | Roots and tubers     | Roots and tubers 3 |
| OTHER ROOTS AND TUBER        | Roots and tubers     | Roots and tubers 2 |
| SOYA BEANS                   | Legumes              | Legumes 2          |
| BROWN BEANS                  | Legumes              | Legumes 1          |
| WHITE BEANS                  | Legumes              | Legumes 2          |
| GROUNDNUTS (UNSHELLED)       | Nuts                 | Nuts               |
| GROUNDNUTS (SHELLED)         | Nuts                 | Nuts               |
| OTHER NUTS/SEEDS/PULSES      | Nuts                 | Nuts               |
| COCONUT                      | Nuts                 | Nuts               |
| KOLA NUT                     | Excluded             | Excluded           |
| CASHEW NUT                   | Nuts                 | Nuts               |
| PALM OIL                     | Palm oil             | Palm oil           |
| BUTTER/ MARGARINE            | Dairy                | Dairy 2            |
| GROUNDNUTS OIL               | Unsaturated oils     | Unsaturated oils   |
| OTHER OIL AND FAT            | Unsaturated oils     | Unsaturated oils   |
| ANIMAL FAT                   | Red meat             | Red meat 2         |
| BANANAS                      | Fruits               | Fruits 1           |

36 Table 1: Mapping food items to food categories and food groups, continued

| <b>Food item</b>                | <b>Food category</b> | <b>Food group</b> |
|---------------------------------|----------------------|-------------------|
| ORANGE/TANGERINE                | Fruits               | Fruits 2          |
| MANGOES                         | Fruits               | Fruits 2          |
| AVOCADO PEAR                    | Fruits               | Fruits 2          |
| PINEAPPLES                      | Fruits               | Fruits 1          |
| FRUIT CANNED                    | Fruits               | Fruits 2          |
| OTHER Fruits                    | Fruits               | Fruits 2          |
| PAWPAW                          | Fruits               | Fruits 1          |
| WATERMELON                      | Fruits               | Fruits 2          |
| APPLES                          | Fruits               | Fruits 2          |
| TOMATOES                        | Vegetables           | Vegetables 3      |
| TOMATO PUREE (CANNED)           | Vegetables           | Vegetables 2      |
| ONIONS                          | Vegetables           | Vegetables 3      |
| GARDEN Eggs/EGG PLANT           | Vegetables           | Vegetables 2      |
| OKRA - FRESH                    | Vegetables           | Vegetables 3      |
| OKRA - DRIED                    | Vegetables           | Vegetables 1      |
| FRESH PEPPER                    | Vegetables           | Vegetables 3      |
| DRY PEPPER                      | Excluded             | Excluded          |
| LEAVES (COCOYAM, SPINACH, ETC.) | Vegetables           | Vegetables 3      |
| OTHER Vegetables (FRESH OR CAN) | Vegetables           | Vegetables 1      |
| CHICKEN                         | Poultry              | Poultry           |
| DUCK                            | Poultry              | Poultry           |
| OTHER DOMESTIC POULTRY          | Poultry              | Poultry           |
| AGRICULTURAL Eggs               | Eggs                 | Eggs              |
| LOCAL Eggs                      | Eggs                 | Eggs              |
| BEEF                            | Red meat             | Red meat 2        |
| MUTTON                          | Red meat             | Red meat 1        |
| PORK                            | Red meat             | Red meat 2        |
| GOAT                            | Red meat             | Red meat 1        |
| WILD GAME/BUSH MEAT             | Red meat             | Red meat 2        |
| CANNED BEEF/CORNERED BEEF       | Red meat             | Red meat 2        |
| OTHER MEAT (EXCL. POULTRY)      | Red meat             | Red meat 2        |
| 4400. Fish - FRESH              | Fish                 | Fish              |
| 4400. Fish - FROZEN             | Fish                 | Fish              |
| 4400. Fish - SMOKED             | Fish                 | Fish              |
| 4400. Fish - DRIED              | Fish                 | Fish              |
| SNAILS                          | Fish                 | Fish              |
| SEAFOOD (LOBSTER, CRAB, PRAWNS) | Fish                 | Fish              |
| CANNED Fish/SEAFOOD             | Fish                 | Fish              |
| OTHER Fish OR SEAFOOD           | Fish                 | Fish              |
| FRESH MILK                      | Dairy                | Dairy 1           |

38 Table 1: Mapping food items to food categories and food groups, continued

| <b>Food item</b>               | <b>Food category</b> | <b>Food group</b> |
|--------------------------------|----------------------|-------------------|
| MILK POWDER                    | Dairy                | Dairy 2           |
| BABY MILK POWDER               | Dairy                | Dairy 2           |
| MILK TINNED (UNSWEETENED)      | Dairy                | Dairy 2           |
| CHEESE (WARA)                  | Dairy                | Dairy 1           |
| OTHER MILK PRODUCTS            | Dairy                | Dairy 2           |
| COFFEE                         | Excluded             | Excluded          |
| CHOCOLATE DRINKS (INCLUDING MI | Sweeteners           | Sweeteners 1      |
| TEA                            | Excluded             | Excluded          |
| SUGAR                          | Sweeteners           | Sweeteners 2      |
| HONEY                          | Sweeteners           | Sweeteners 2      |
| OTHER SWEETS AND CONFECTIONARY | Sweeteners           | Sweeteners 2      |
| CONDIMENTS (SALT, SPICES, PEPP | Excluded             | Excluded          |
| SALT                           | Excluded             | Excluded          |
| UNGROUND OGBONO                | Nuts                 | Nuts              |
| GROUND OGBONO                  | Nuts                 | Nuts              |
| GROUND PEPPER                  | Excluded             | Excluded          |
| MELON (SHELLED)                | Nuts                 | Nuts              |
| MELON (UNSHELLED)              | Nuts                 | Nuts              |
| MELLON (GROUND)                | Nuts                 | Nuts              |
| OTHER SPICES                   | Excluded             | Excluded          |
| BOTTLED WATER                  | Excluded             | Excluded          |
| SACHET WATER                   | Excluded             | Excluded          |
| MALT DRINKS                    | Excluded             | Excluded          |
| SOFT DRINKS (COCA COLA, SPIRIT | Sweeteners           | Sweeteners 1      |
| FRUIT JUICE CANNED/PACK        | Sweeteners           | Sweeteners 1      |
| OTHER NON-Alcoholic DRINKS     | Excluded             | Excluded          |
| BEER (LOCAL AND IMPORTED)      | Excluded             | Excluded          |
| PALM WINE                      | Excluded             | Excluded          |
| PITO                           | Excluded             | Excluded          |
| GIN                            | Excluded             | Excluded          |
| OTHER Alcoholic BEVERAGES      | Excluded             | Excluded          |
| GUAVA                          | Fruits               | Fruits 1          |

39 Note: Of the more than 160 food items, consumption values were reported for 112 food items. Food items not falling in the  
40 EAT-Lancet food categories<sup>1</sup> were excluded from this analysis such as non-sweetened beverages (e.g. tea, coffee and bottled  
41 water), alcoholic drinks and condiments. This resulted in 95 food items were included in this analysis.

42

43

**a**

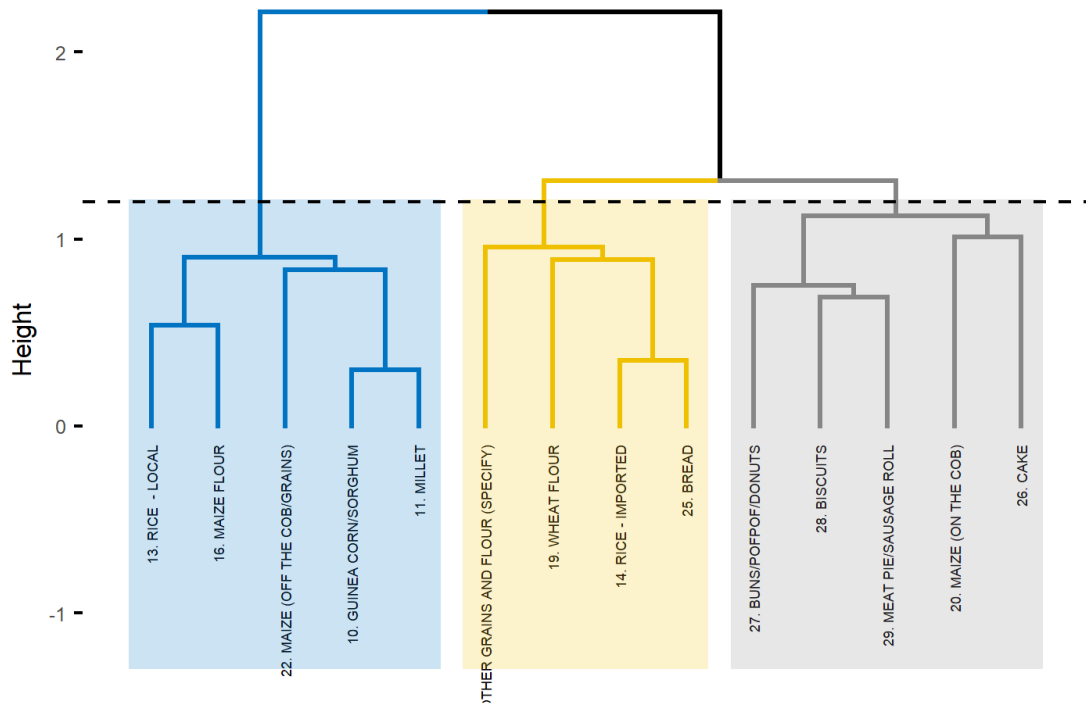

**b**

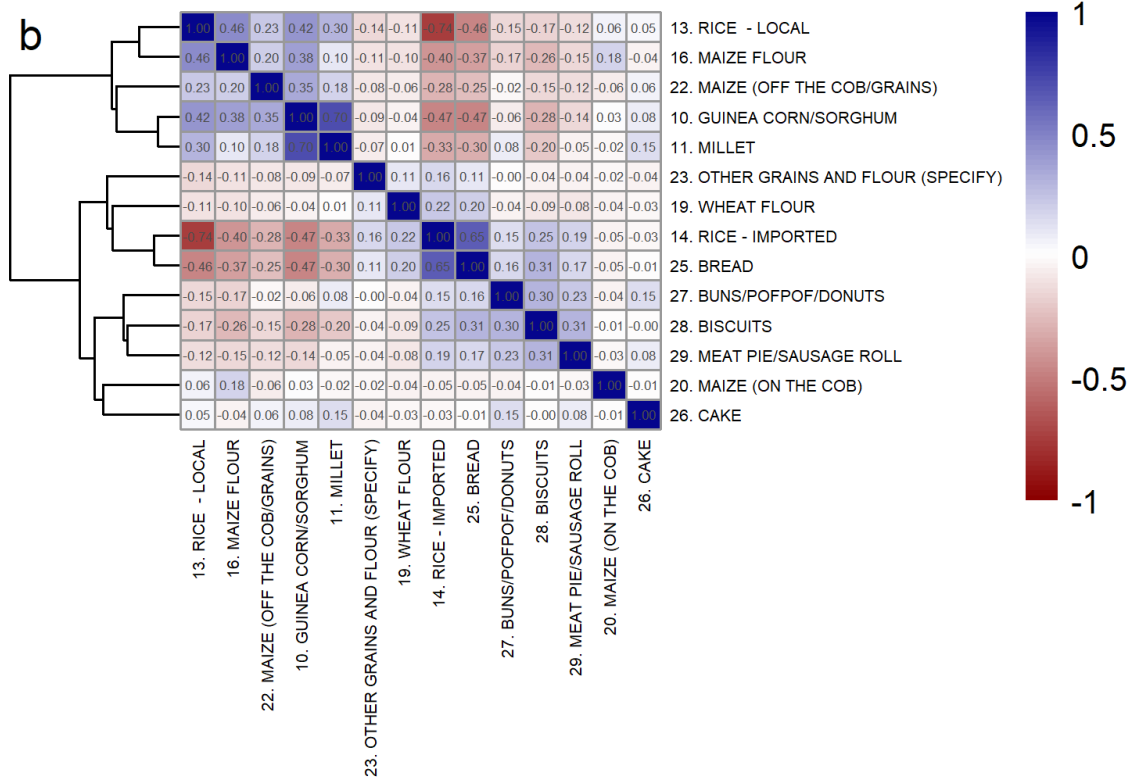

44

45 Supplementary Fig. 8: **a**, Dendrogram based on Ward's minimum variance method using the used the

46 pairwise Pearson's correlation between the food items as a distance measure with a cut-off point of

47 1.2 clustering height for cereals. **b**, Heat maps based on the pairwise Pearson's correlation between

48 food items for cereals.

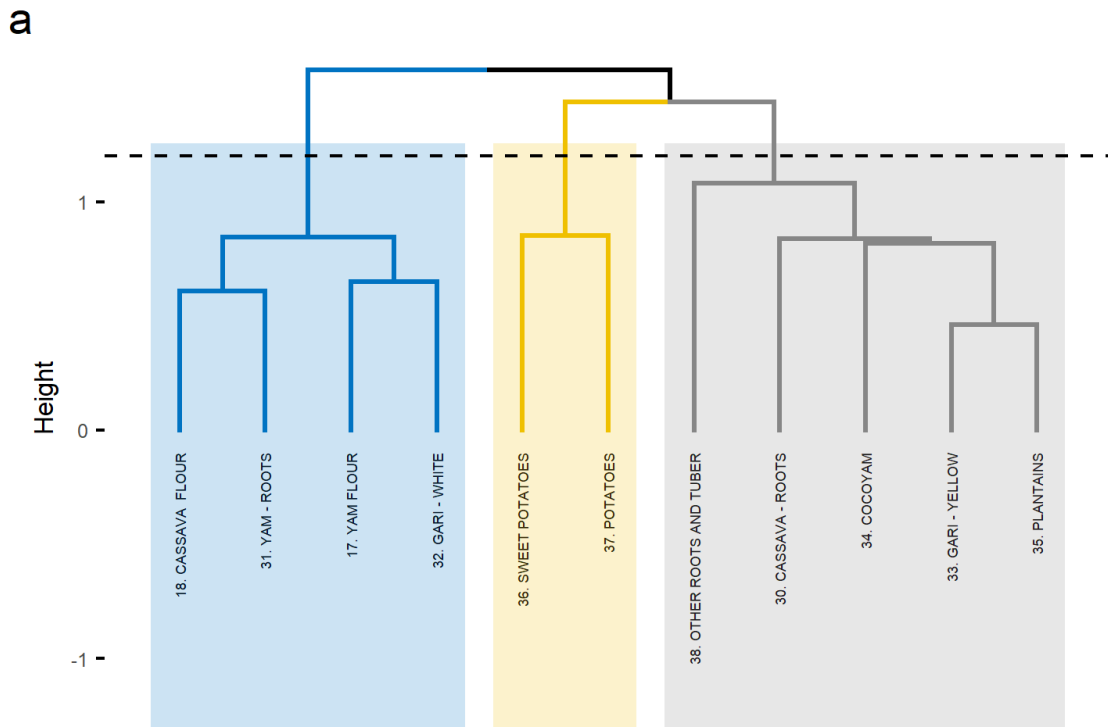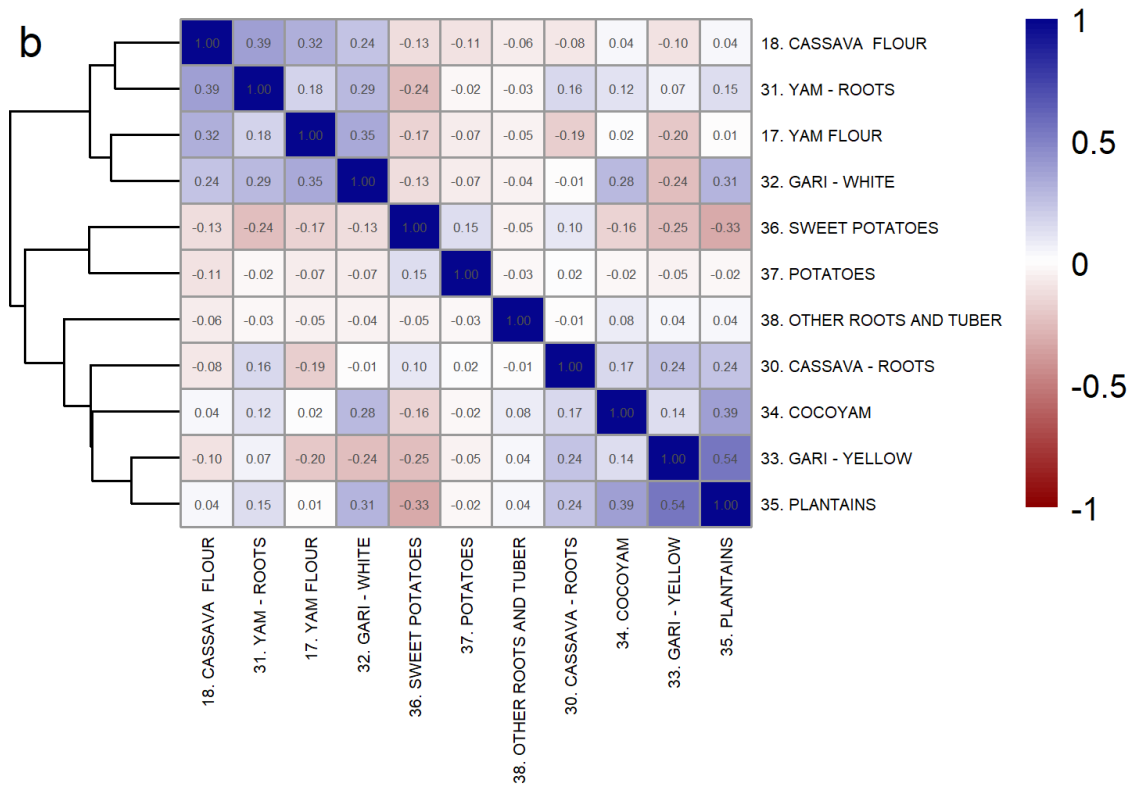

49

50 Supplementary Fig. 9: **a**, Dendrogram based on Ward's minimum variance method using the used the  
 51 pairwise Pearson's correlation between the food items as a distance measure with a cut-off point of  
 52 1.2 clustering height for roots and tubers. **b**, Heat maps based on the pairwise Pearson's correlation  
 53 between food items for roots and tubers.

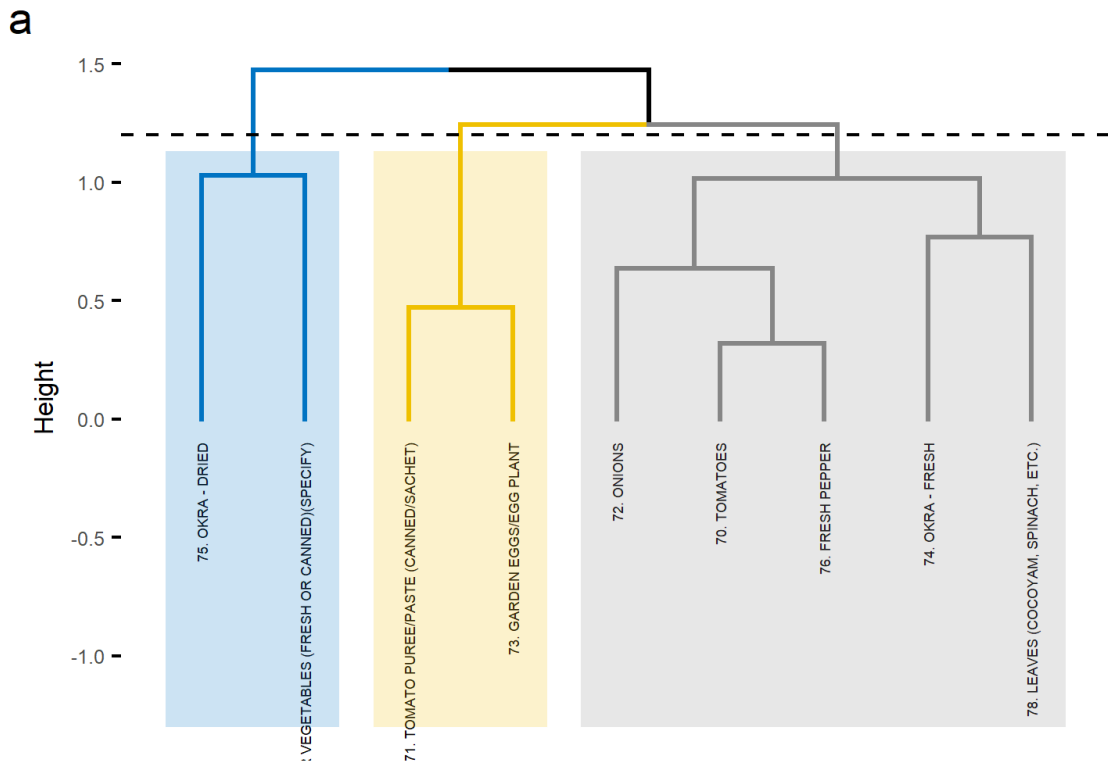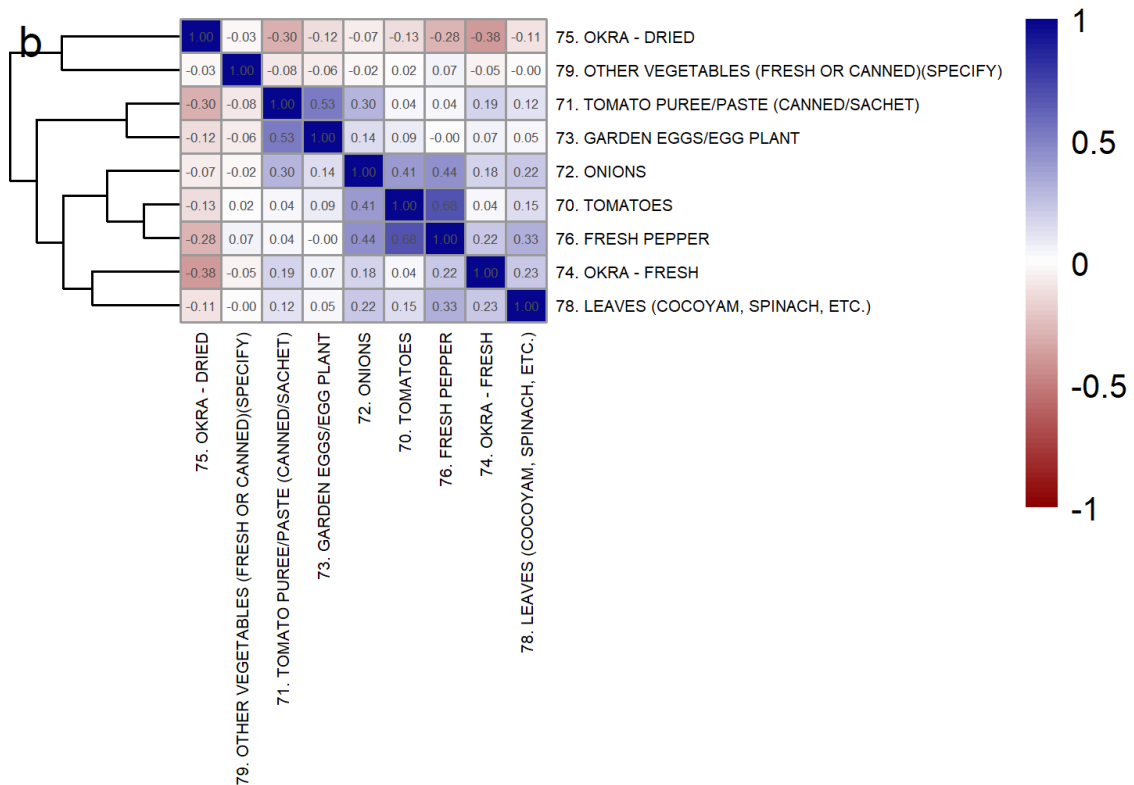

54

55 Supplementary Fig. 10: **a**, Dendrogram based on Ward's minimum variance method using the used

56 the pairwise Pearson's correlation between the food items as a distance measure with a cut-off point

57 of 1.2 clustering height for vegetables. **b**, Heat maps based on the pairwise Pearson's correlation

58 between food items for vegetables.

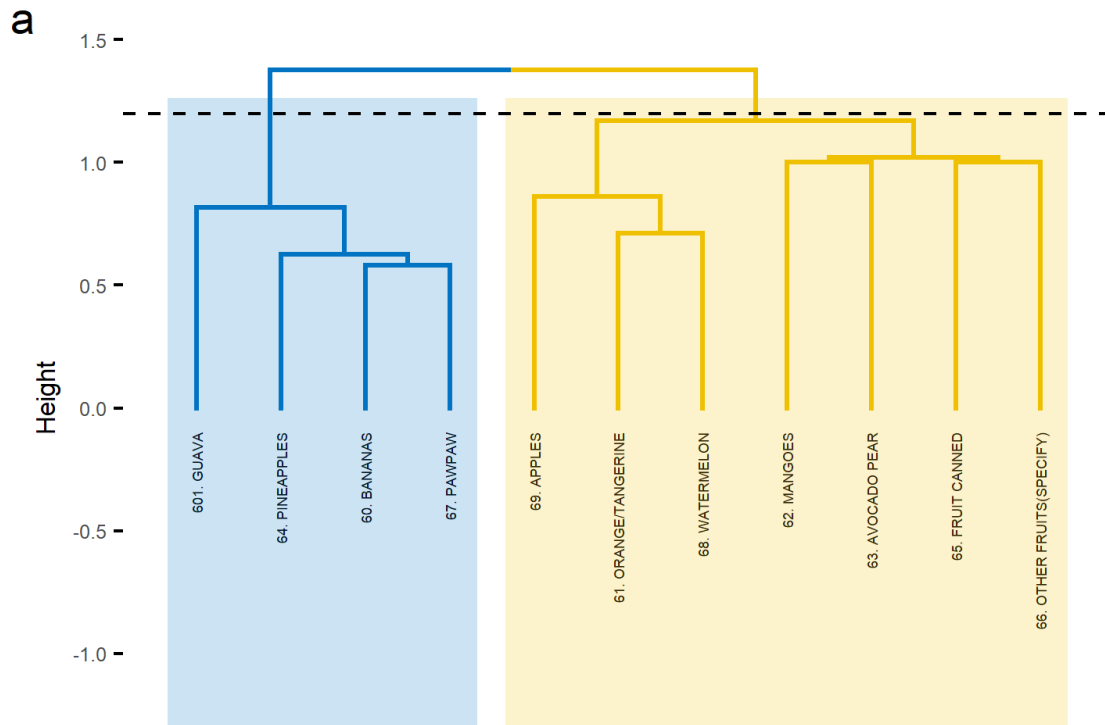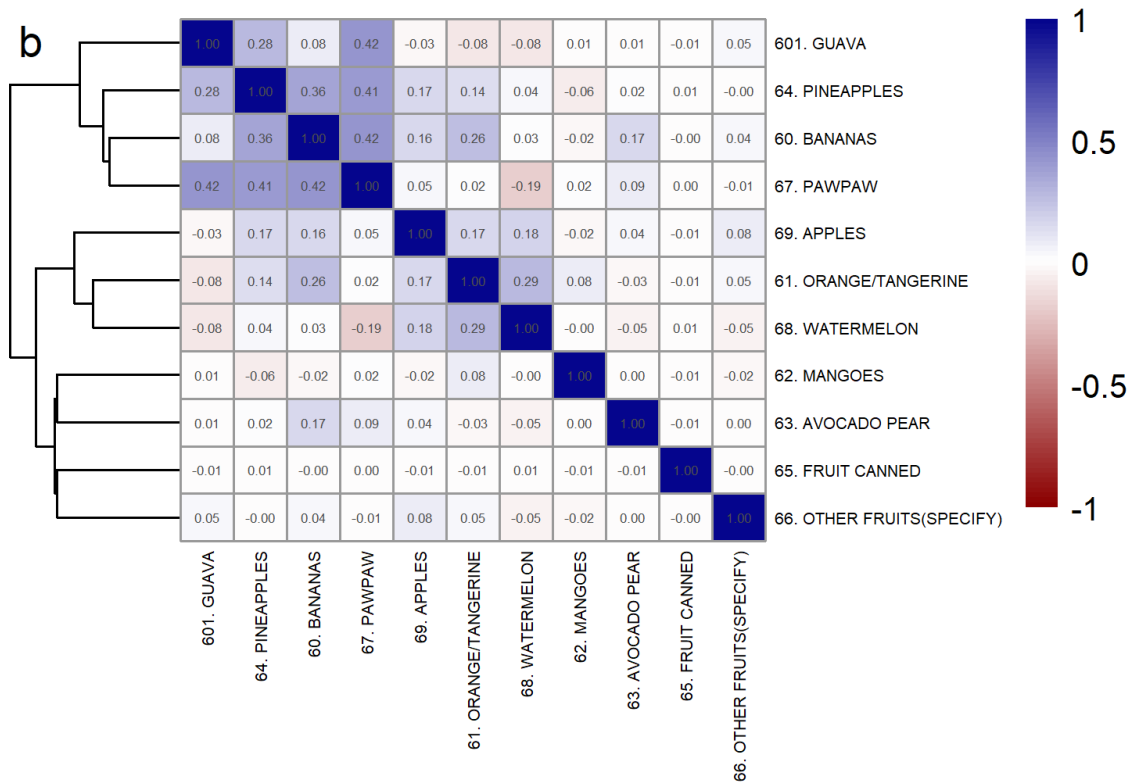

59

60 Supplementary Fig. 11: **a**, Dendrogram based on Ward's minimum variance method using the used  
 61 the pairwise Pearson's correlation between the food items as a distance measure with a cut-off point  
 62 of 1.2 clustering height for fruits. **b**, Heat maps based on the pairwise Pearson's correlation between  
 63 food items for fruits.

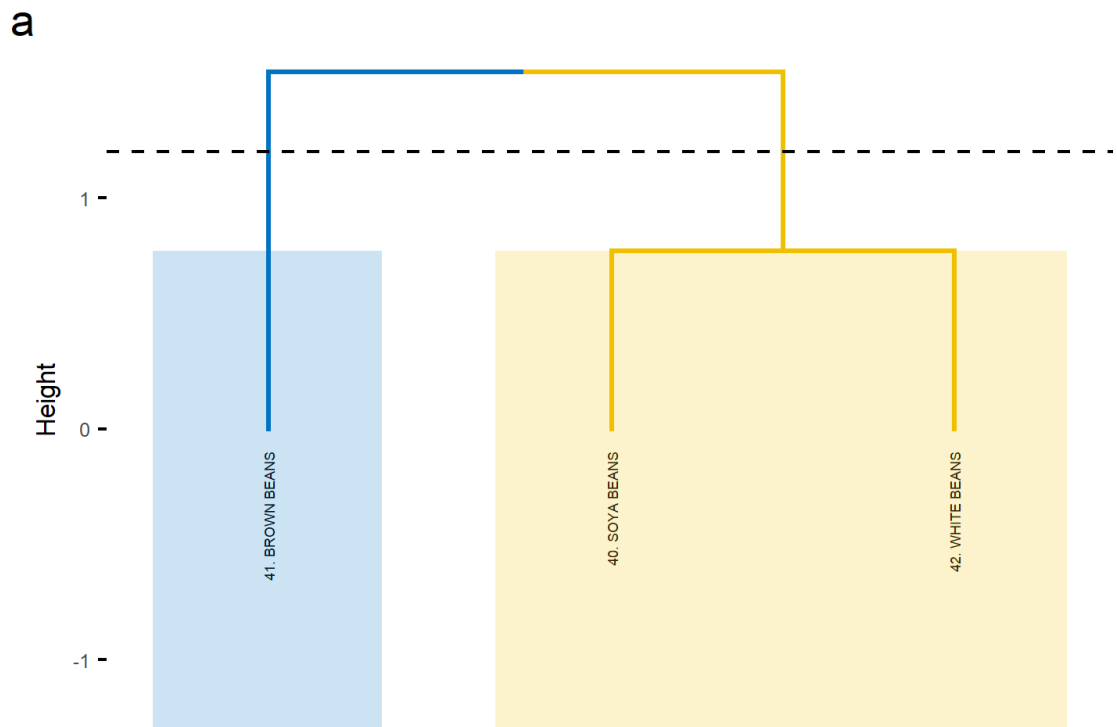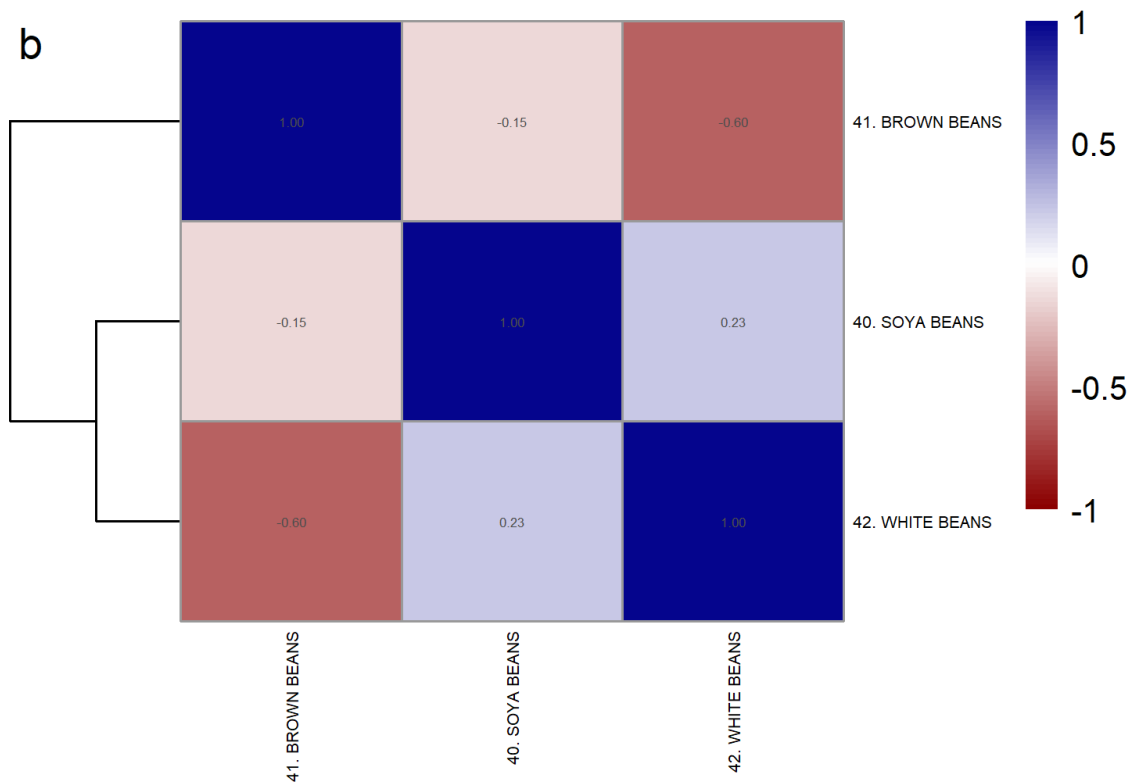

64

65 Supplementary Fig. 12: **a**, Dendrogram based on Ward's minimum variance method using the used  
 66 the pairwise Pearson's correlation between the food items as a distance measure with a cut-off point  
 67 of 1.2 clustering height for legumes. **b**, Heat maps based on the pairwise Pearson's correlation  
 68 between food items for legumes.

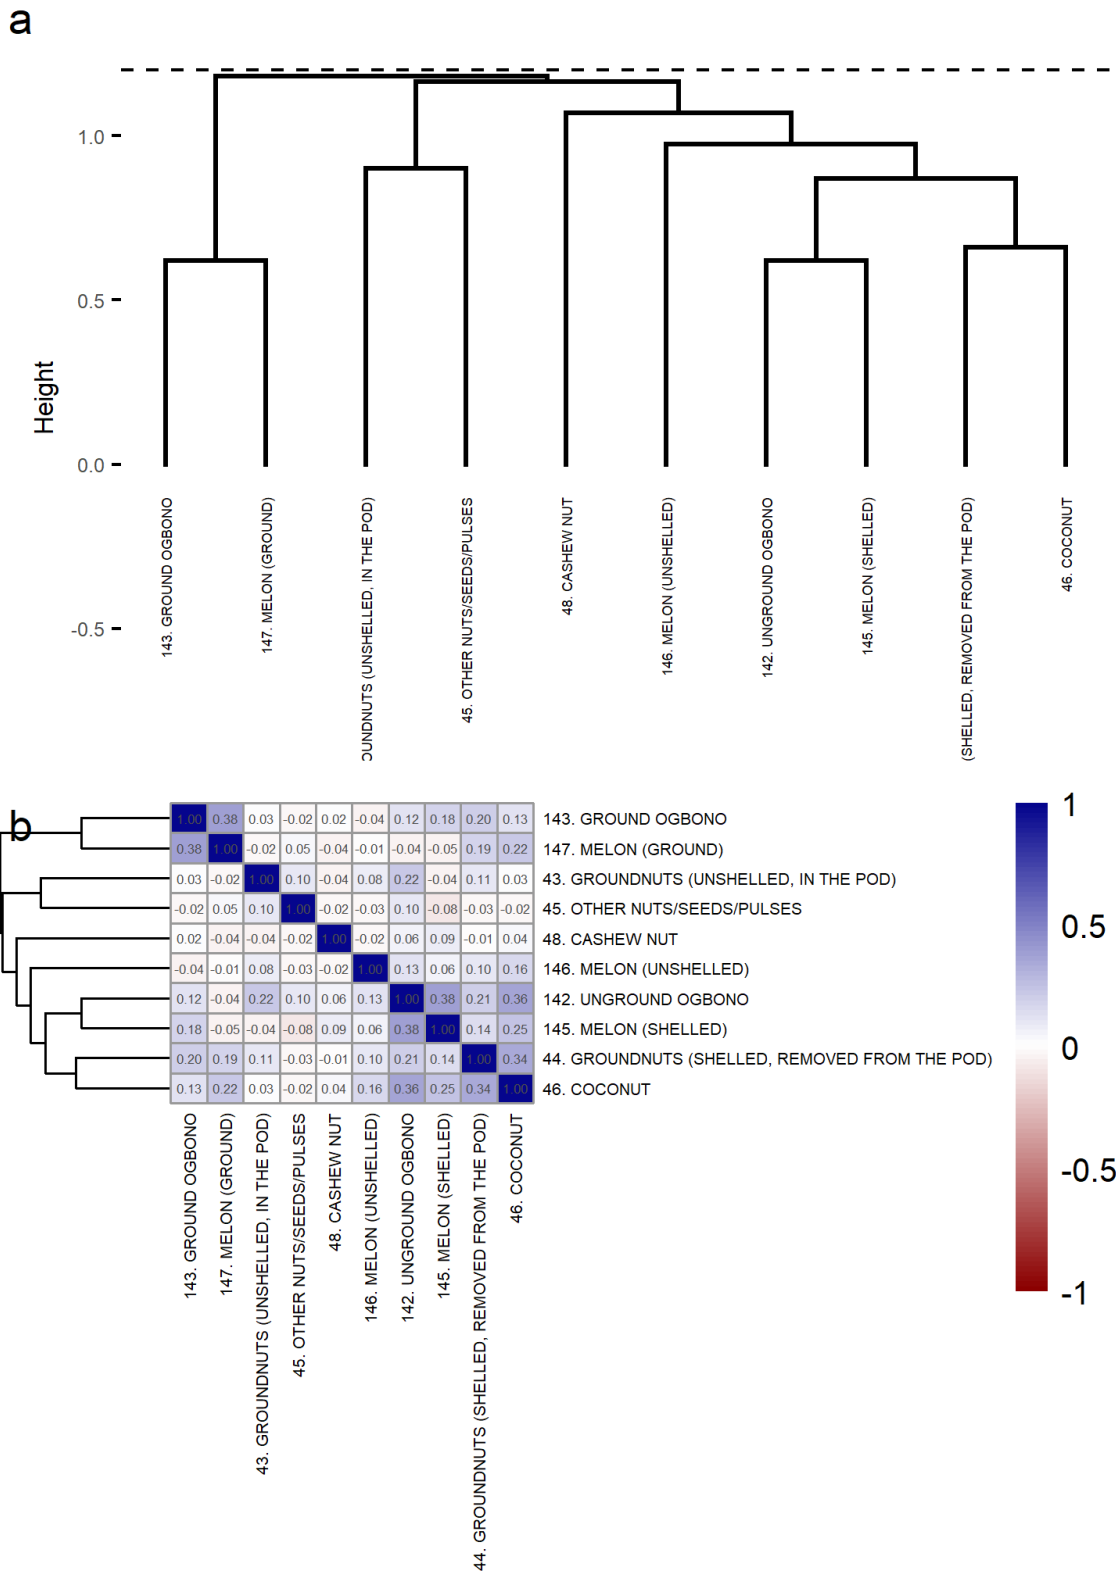

69

70 Supplementary Fig. 13: **a**, Dendrogram based on Ward's minimum variance method using the used  
 71 the pairwise Pearson's correlation between the food items as a distance measure with a cut-off point  
 72 of 1.2 clustering height for nuts. **b**, Heat maps based on the pairwise Pearson's correlation between  
 73 food items for nuts.

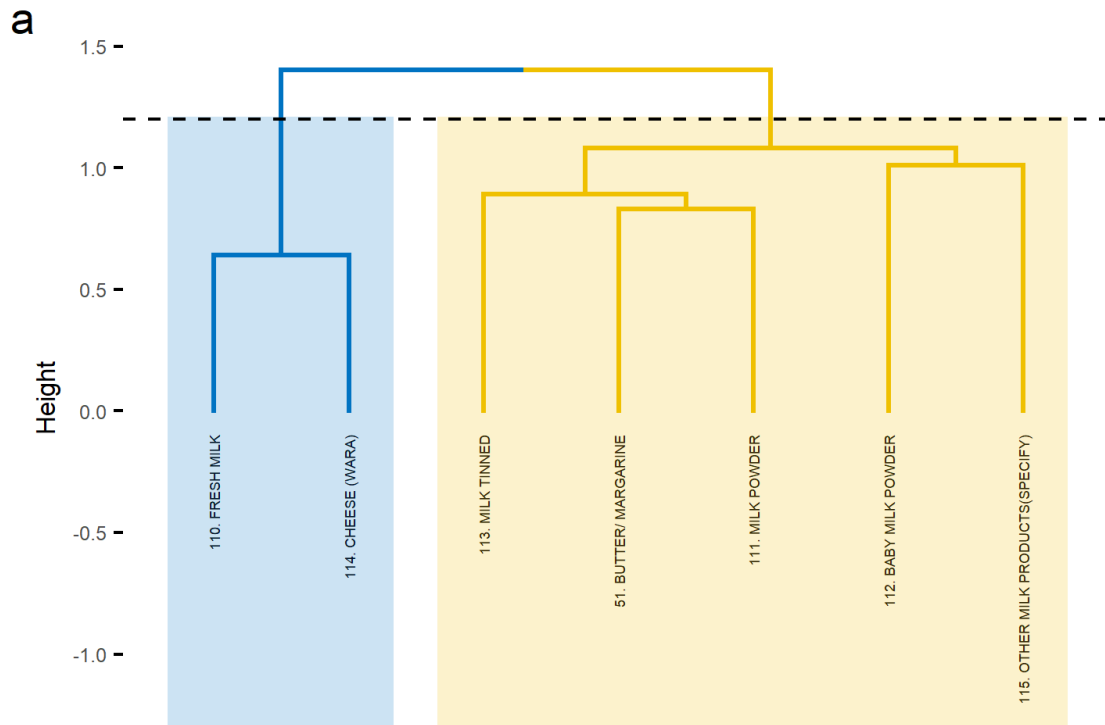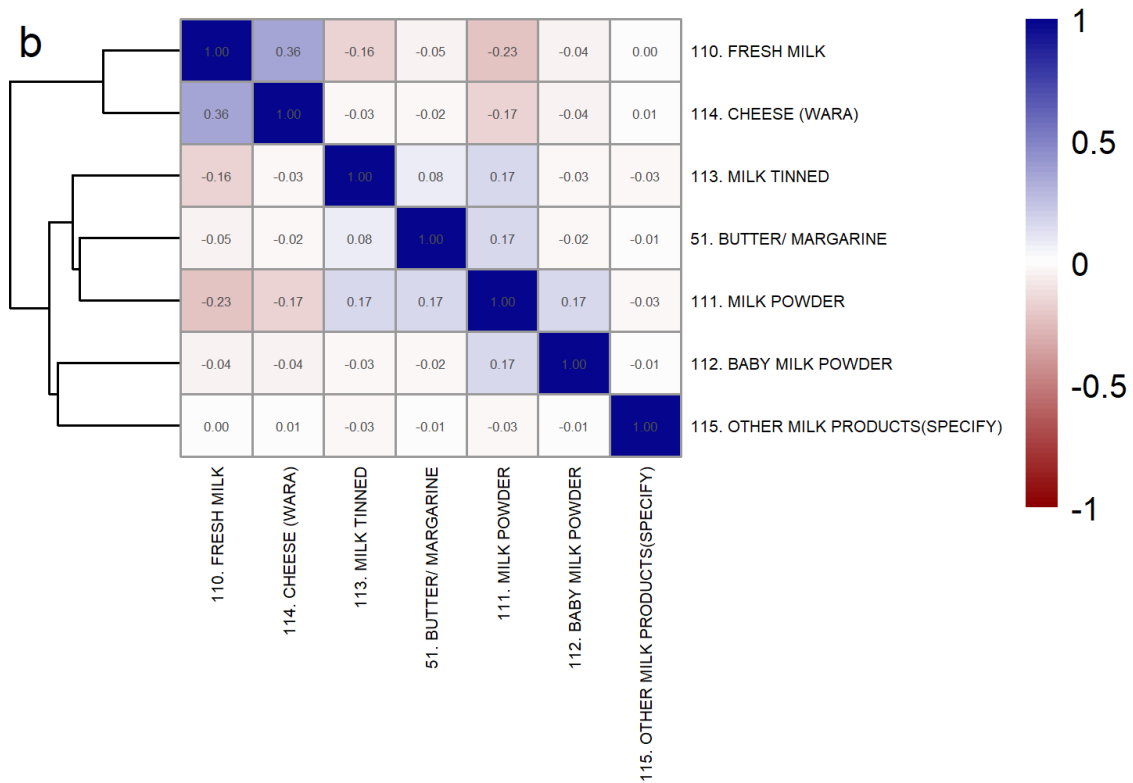

74

75 Supplementary Fig. 14: **a**, Dendrogram based on Ward's minimum variance method using the used  
 76 the pairwise Pearson's correlation between the food items as a distance measure with a cut-off point  
 77 of 1.2 clustering height for dairy. **b**, Heat maps based on the pairwise Pearson's correlation between  
 78 food items for dairy.

**a**

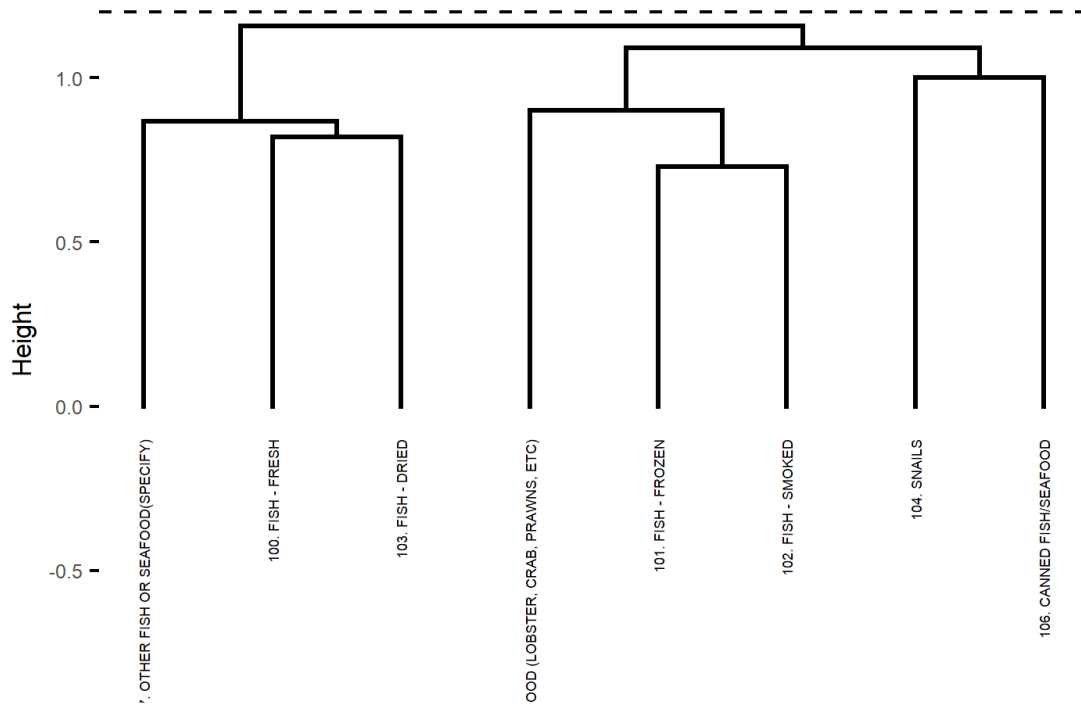

**b**

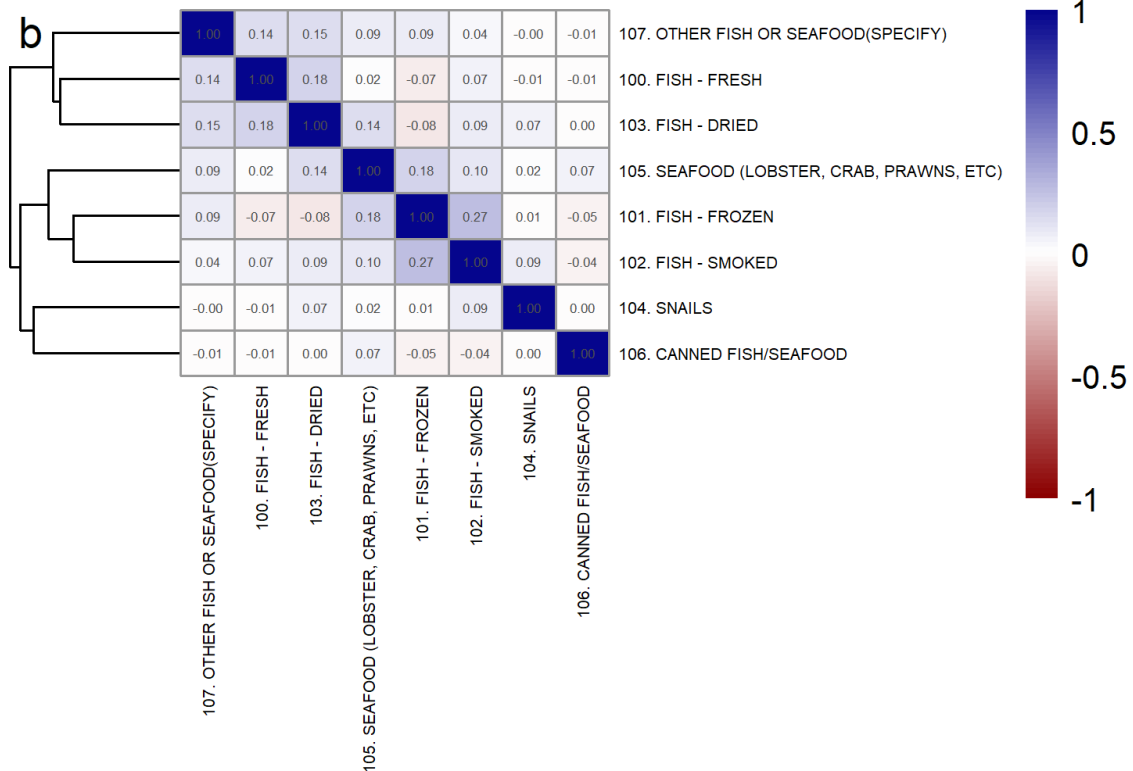

79

80 Supplementary Fig. 15: **a**, Dendrogram based on Ward's minimum variance method using the used  
 81 the pairwise Pearson's correlation between the food items as a distance measure with a cut-off point  
 82 of 1.2 clustering height for fish. **b**, Heat maps based on the pairwise Pearson's correlation between  
 83 food items for fish.

**a**

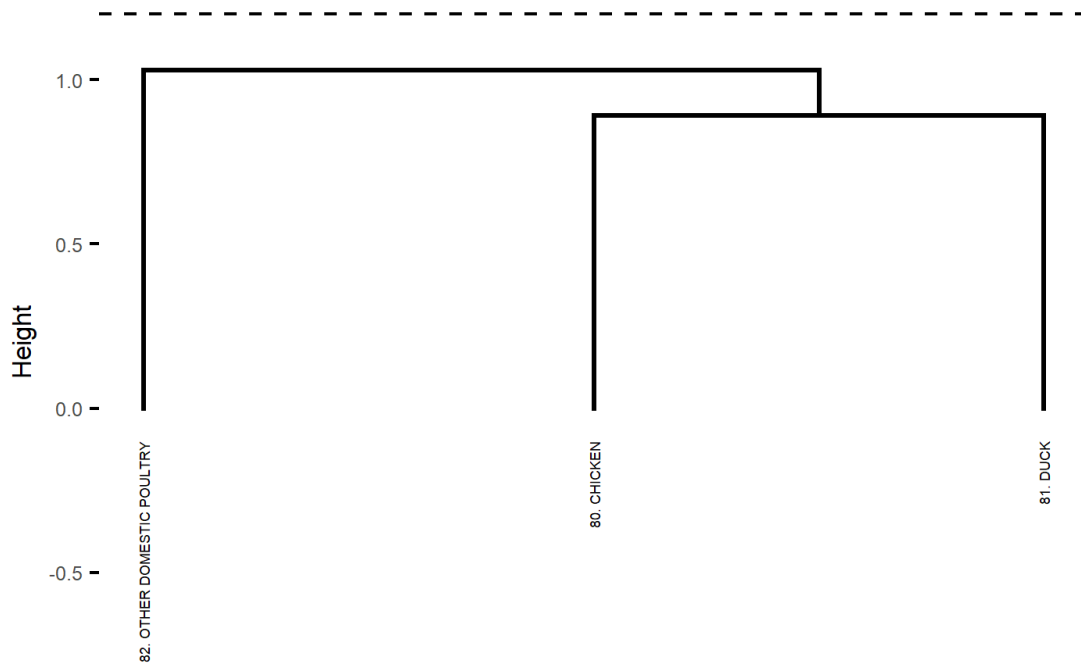

**b**

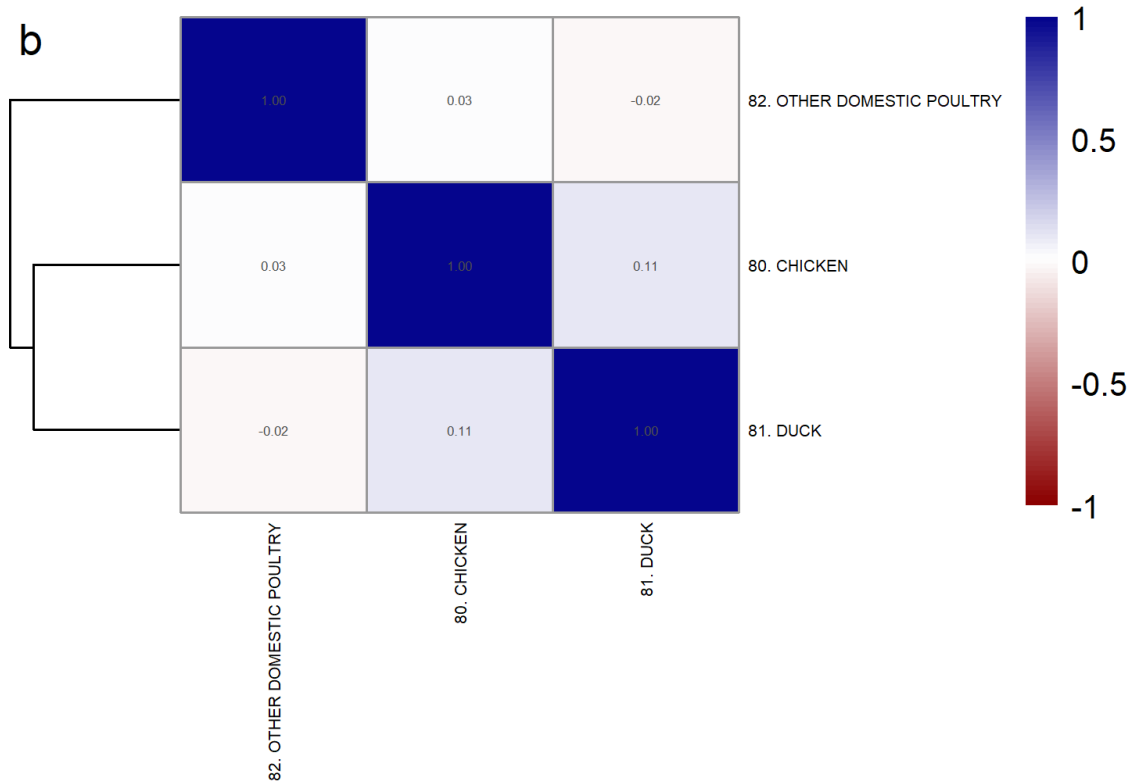

84

85 Supplementary Fig. 16: **a**, Dendrogram based on Ward's minimum variance method using the used  
86 the pairwise Pearson's correlation between the food items as a distance measure with a cut-off point  
87 of 1.2 clustering height for poultry. **b**, Heat maps based on the pairwise Pearson's correlation  
88 between food items for poultry.

a

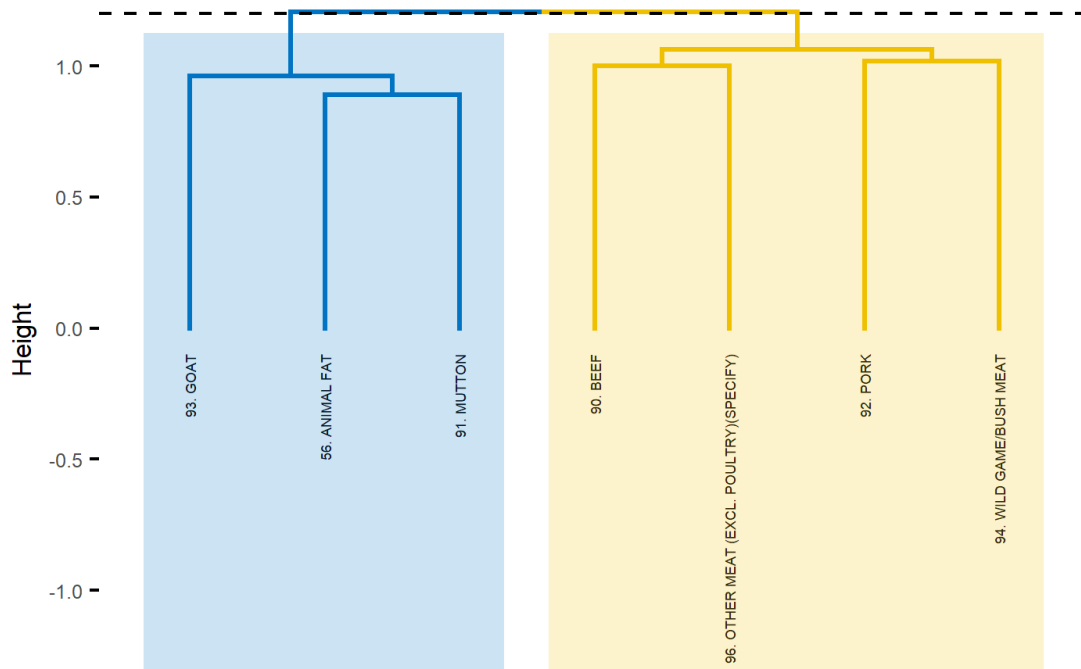

b

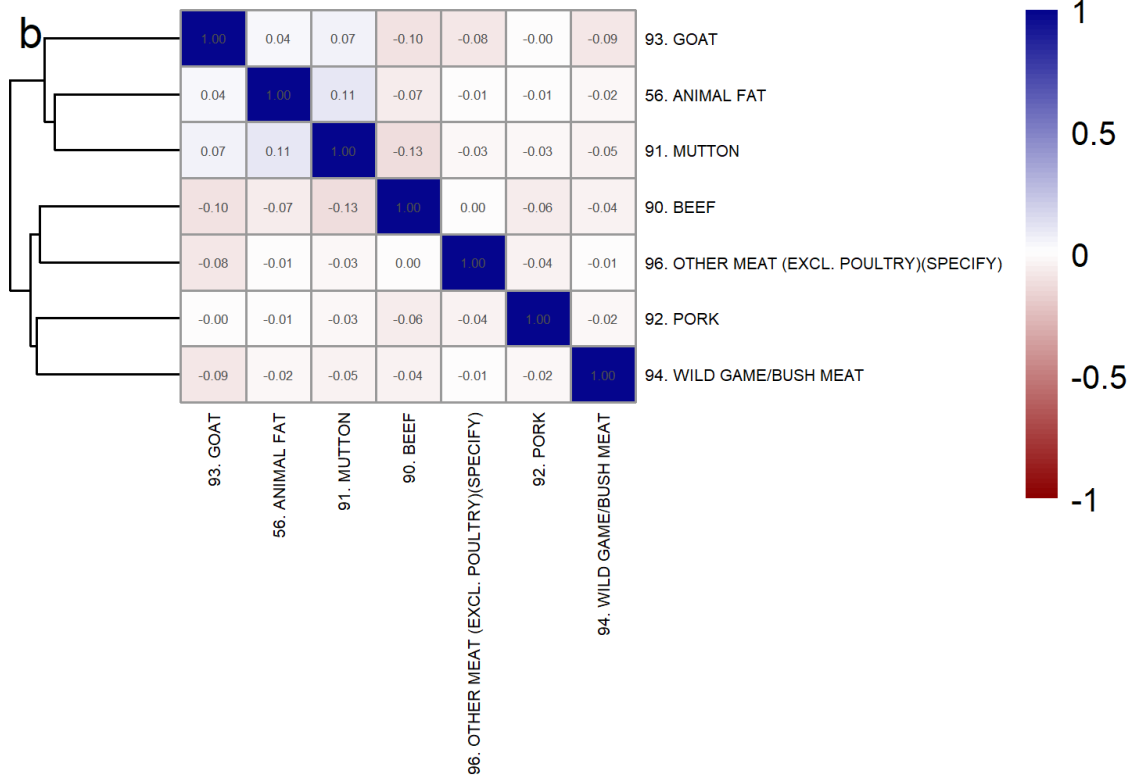

89

90 Supplementary Fig. 17: **a**, Dendrogram based on Ward's minimum variance method using the used  
 91 the pairwise Pearson's correlation between the food items as a distance measure with a cut-off point  
 92 of 1.2 clustering height for red meat. **b**, Heat maps based on the pairwise Pearson's correlation  
 93 between food items for red meat.

94

**a**

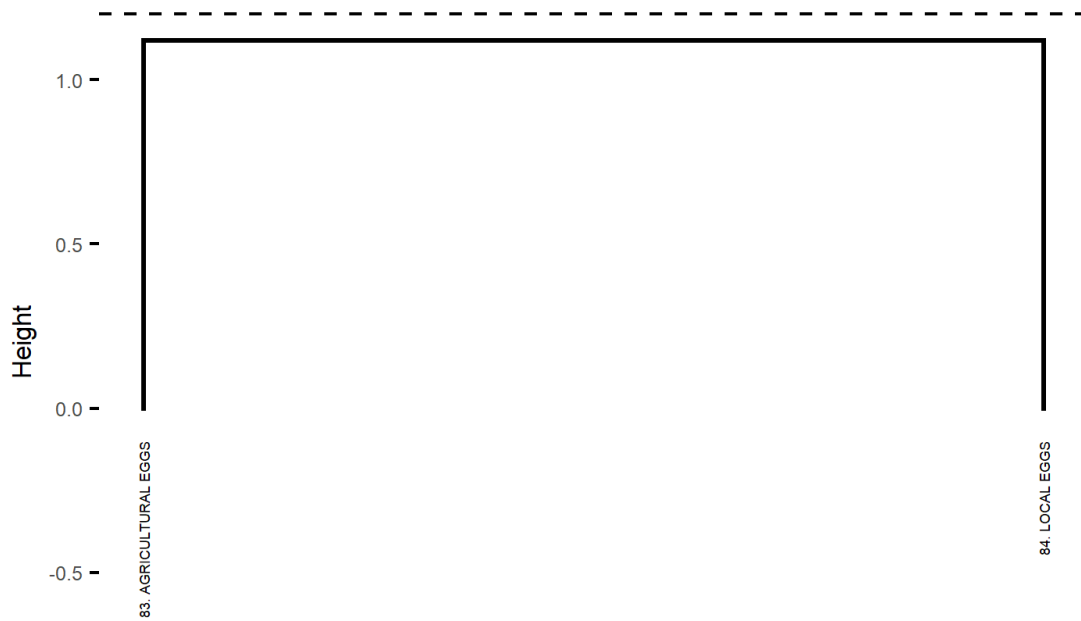

**b**

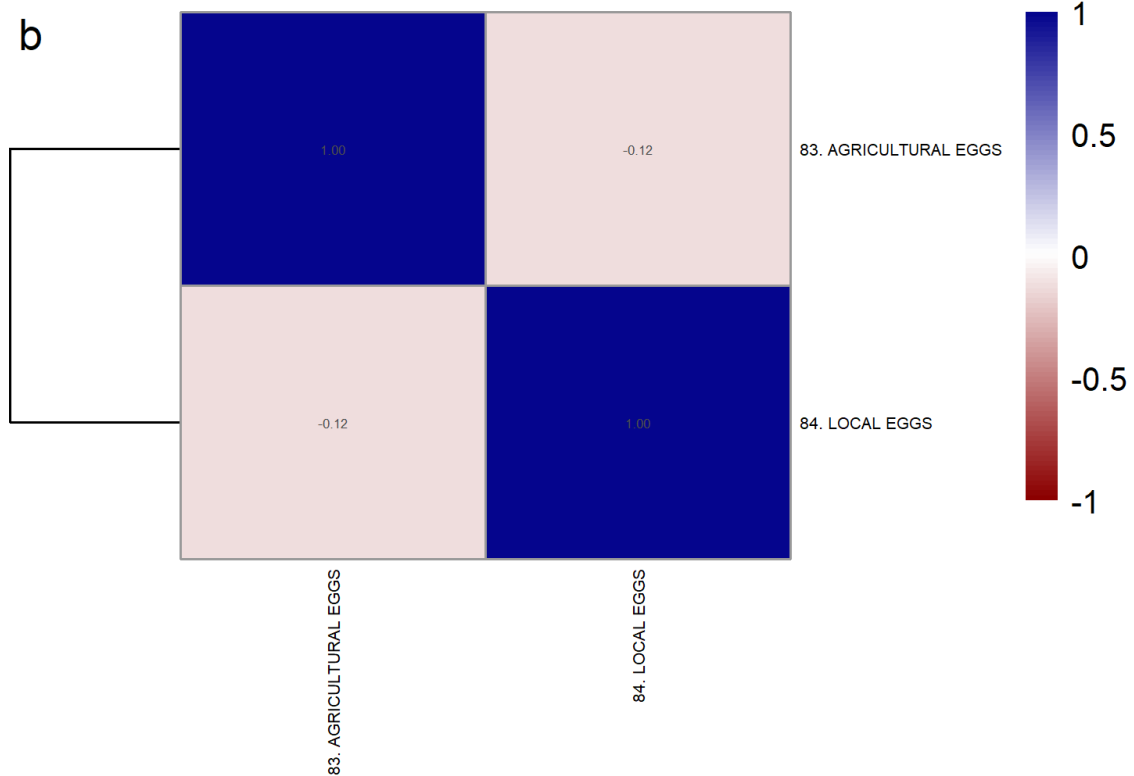

95

96 Supplementary Fig. 18: **a**, Dendrogram based on Ward's minimum variance method using the used  
97 the pairwise Pearson's correlation between the food items as a distance measure with a cut-off point  
98 of 1.2 clustering height for eggs. **b**, Heat maps based on the pairwise Pearson's correlation between  
99 food items for eggs.

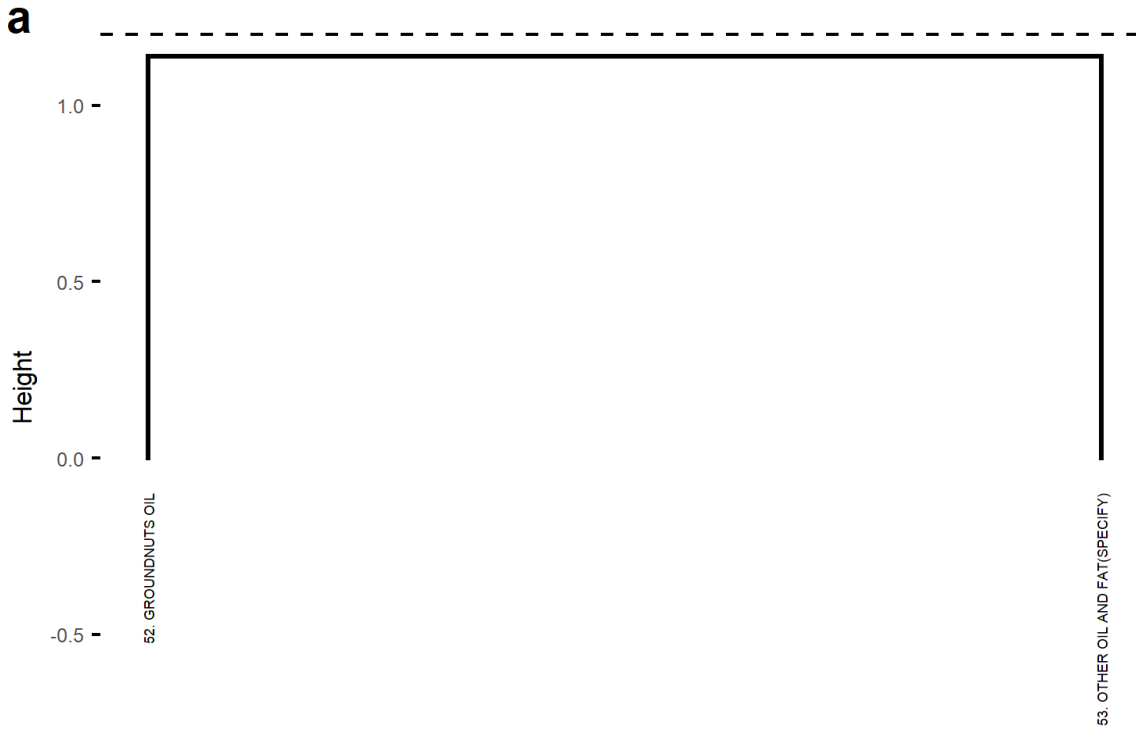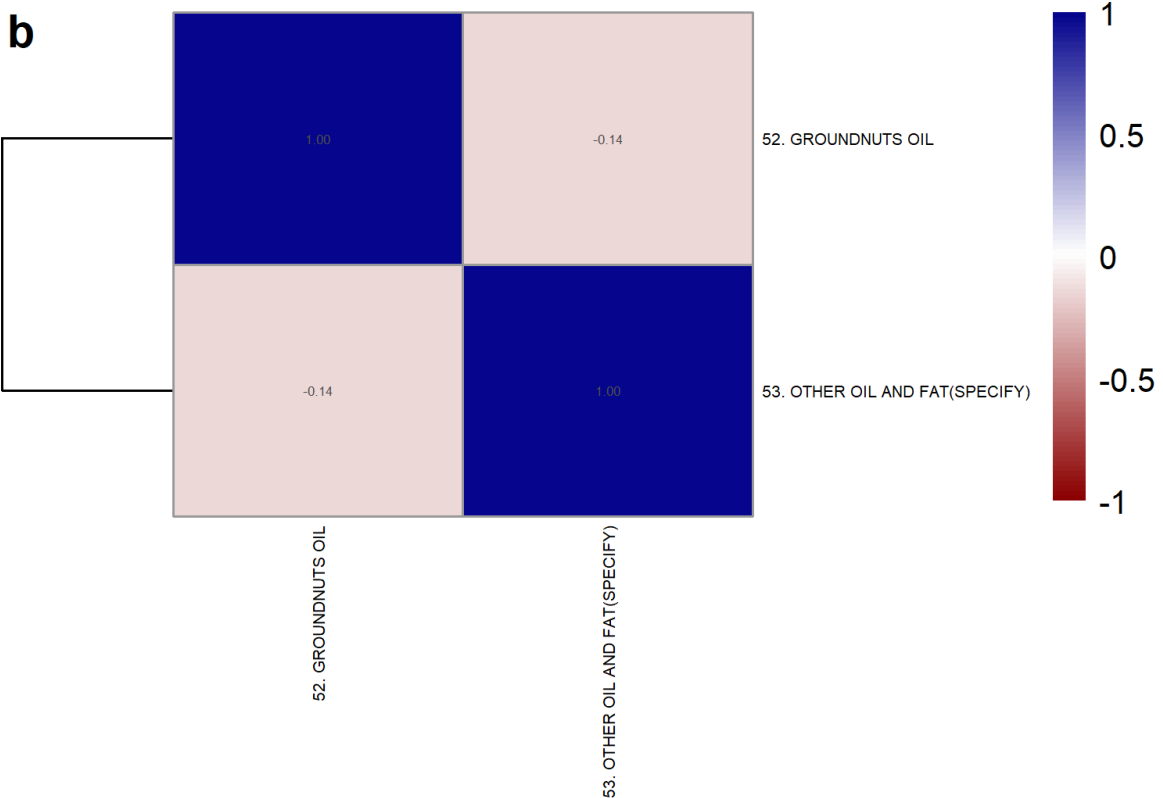

100

101 Supplementary Fig. 19: **a**, Dendrogram based on Ward's minimum variance method using the used  
 102 the pairwise Pearson's correlation between the food items as a distance measure with a cut-off point  
 103 of 1.2 clustering height for unsaturated oils. **b**, Heat maps based on the pairwise Pearson's  
 104 correlation between food items for unsaturated oils.

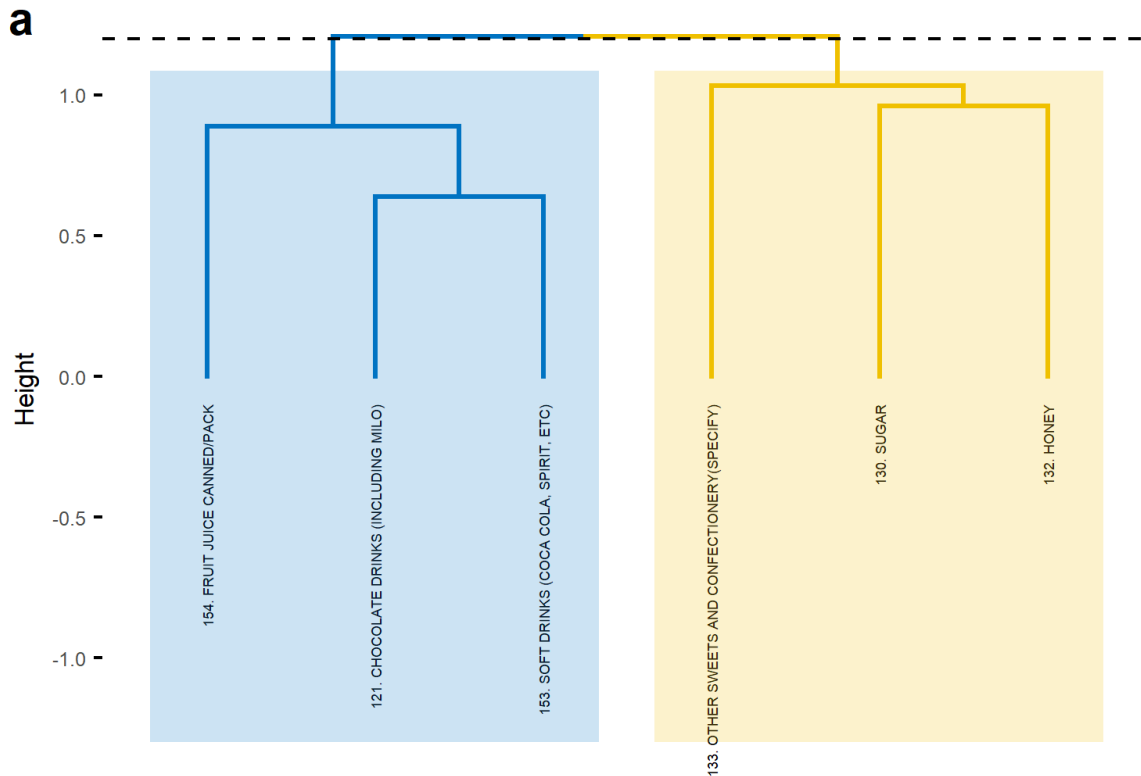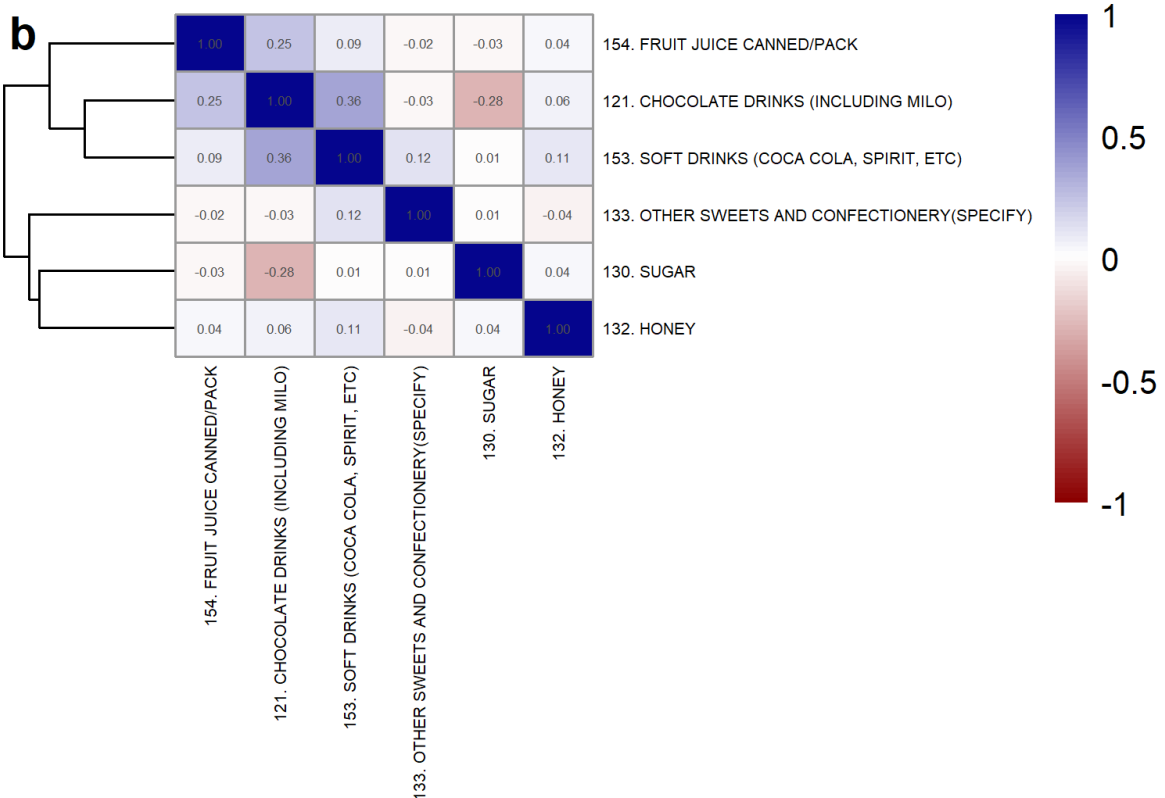

105

106 Supplementary Fig. 20: **a**, Dendrogram based on Ward's minimum variance method using the used  
 107 the pairwise Pearson's correlation between the food items as a distance measure with a cut-off point  
 108 of 1.2 clustering height for sweeteners. **b**, Heat maps based on the pairwise Pearson's correlation  
 109 between food items for sweeteners.

110 Table 2: Model performance ( $R^2$ ) and the percentage of total kcal consumption (%) of the analysed 25  
 111 food groups, categorised under 14 EAT-Lancet food categories.

| <b>Food category</b> | <b>Food group</b>  | <b><math>R^2</math></b> | <b>Percentage of total kcal consumption (%)</b> |
|----------------------|--------------------|-------------------------|-------------------------------------------------|
| Dairy                | Dairy 1            | 0.52                    | 0.04                                            |
| Dairy                | Dairy 2            | 0.44                    | 0.79                                            |
| Eggs                 | Eggs               | 0.39                    | 0.5                                             |
| Fish                 | Fish               | 0.61                    | 2.71                                            |
| Fruits               | Fruits 1           | 0.56                    | 1.88                                            |
| Fruits               | Fruits 2           | 0.31                    | 1.53                                            |
| Grains               | Grains 1           | 0.88                    | 13.46                                           |
| Grains               | Grains 2           | 0.72                    | 17.71                                           |
| Grains               | Grains 3           | 0.1                     | 0.49                                            |
| Legumes              | Legumes 1          | 0.42                    | 4.32                                            |
| Legumes              | Legumes 2          | 0.51                    | 3.63                                            |
| Nuts                 | Nuts               | 0.59                    | 2.48                                            |
| Palm oil             | Palm oil           | 0.42                    | 8.37                                            |
| Poultry              | Poultry            | 0.13                    | 0.67                                            |
| Red meat             | Red meat 1         | 0.34                    | 0.19                                            |
| Red meat             | Red meat 2         | 0.3                     | 2.18                                            |
| Roots and tubers     | Roots and tubers 1 | 0.74                    | 20.28                                           |
| Roots and tubers     | Roots and tubers 2 | 0.58                    | 9.32                                            |
| Roots and tubers     | Roots and tubers 3 | 0.43                    | 0.58                                            |
| Sweeteners           | Sweeteners 1       | 0.49                    | 0.69                                            |
| Sweeteners           | Sweeteners 2       | 0.5                     | 0.93                                            |
| Unsaturated oils     | Unsaturated oils   | 0.42                    | 5.46                                            |
| Vegetables           | Vegetables 1       | 0.39                    | 0.05                                            |
| Vegetables           | Vegetables 2       | 0.72                    | 0.17                                            |
| Vegetables           | Vegetables 3       | 0.48                    | 1.57                                            |

112

113

114

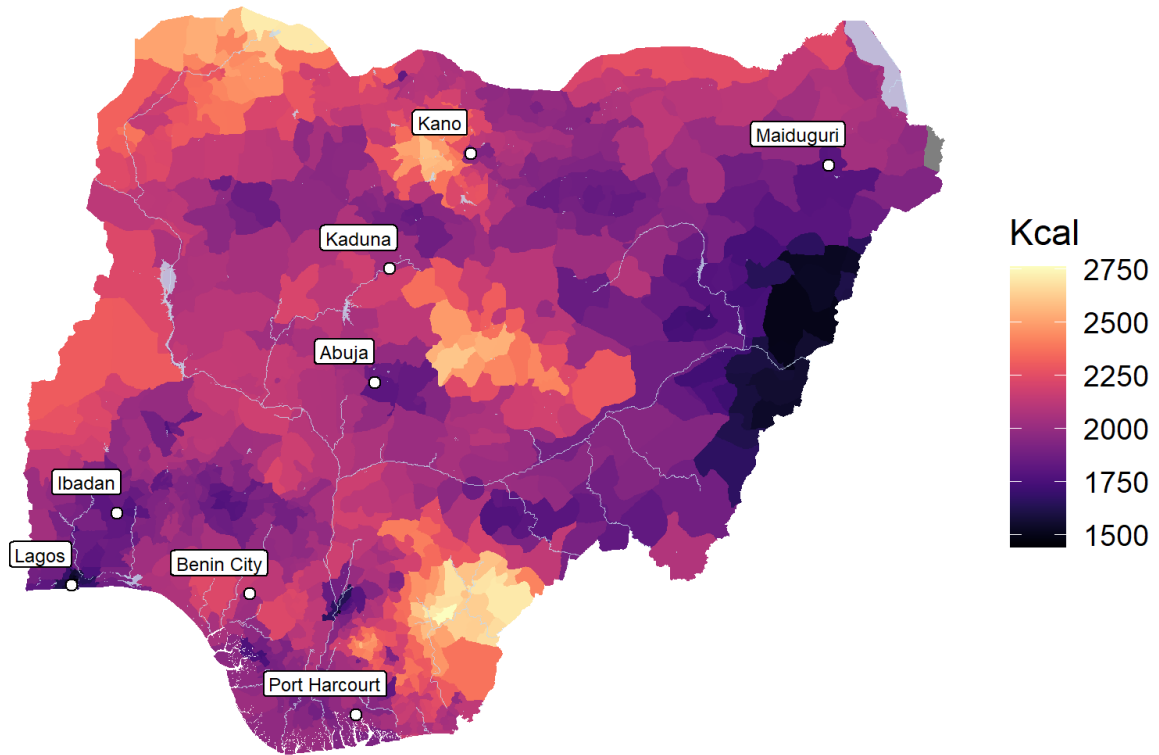

115

116 Supplementary Fig. 21: The sum of the predicted daily per capita energy (kcal) consumption (AFE) of  
 117 the 25 food (sub)groups at local governmental area (LGA), which are administrative level 2 units.

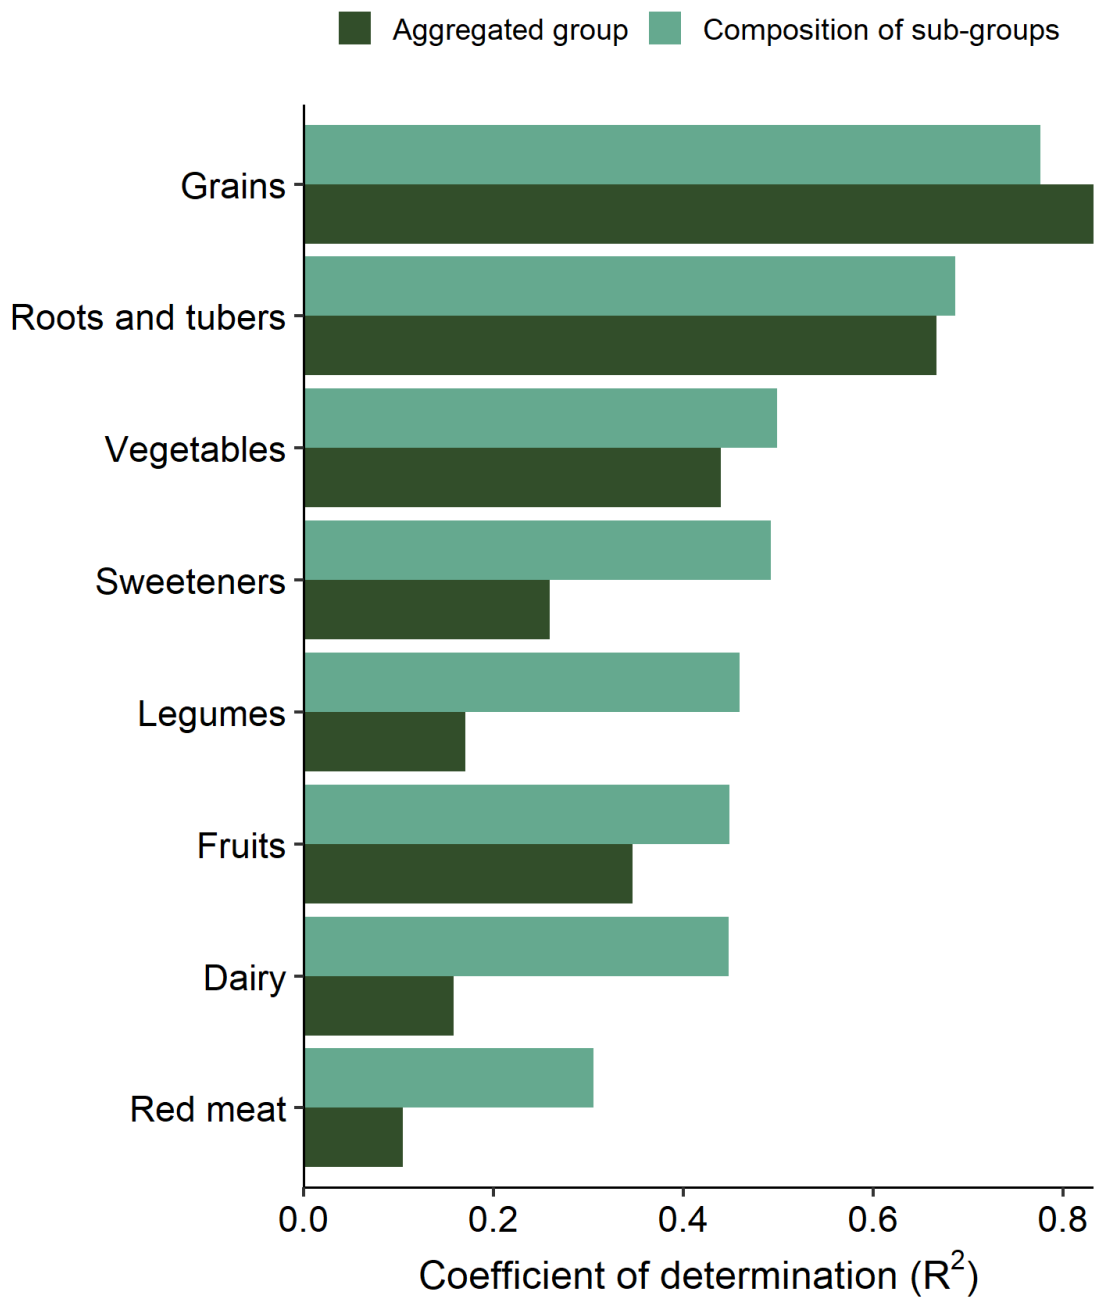

118

119 Supplementary Fig. 22: Comparison of the model performance of the weighted mean of the  
 120 coefficient of determination (R<sup>2</sup>) of the sub-food groups and of the food group directly. For the eight  
 121 food groups grains, root and tubers, vegetables, sweeteners, legumes, fruits, dairy and red meat the  
 122 weighted mean of the coefficient of determination of the sub-food groups were taken. For the  
 123 weights, the mean kcal consumption of the sub-food groups was used. The subdivision of these eight  
 124 food groups into two or more sub-groups was the result of the conducted hierarchical cluster  
 125 analysis on the 14 major food groups (Supplementary Fig. 8-20). The model performance is  
 126 compared with the model runs of the direct food groups.

127

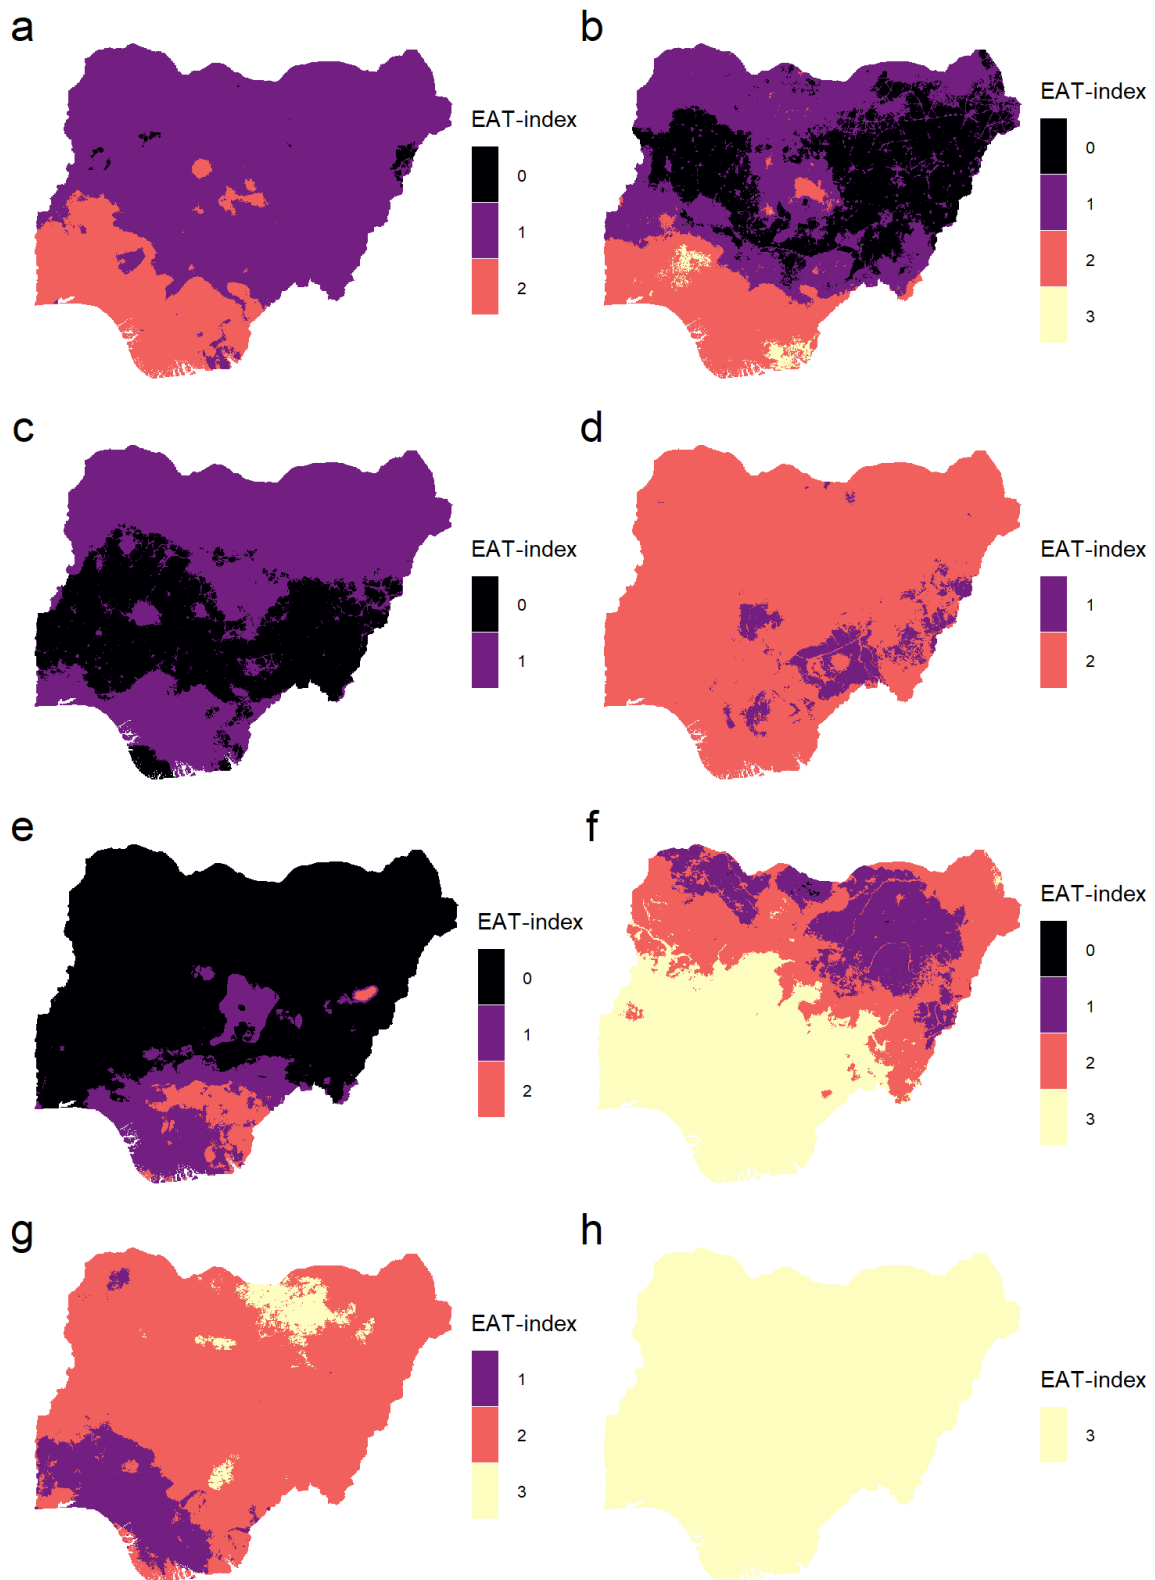

128  
 129  
 130  
 131

Supplementary Fig. 23: EAT-Lancet (EAT) index at grid level (30 arcsecond) for vegetables (a), fruits (b), unsaturated oils (c), legumes (d), nuts (e), fish (f), red meat (g), poultry (h). Per food group the score ranges from 0 to 3 (See Supplementary Table 4).

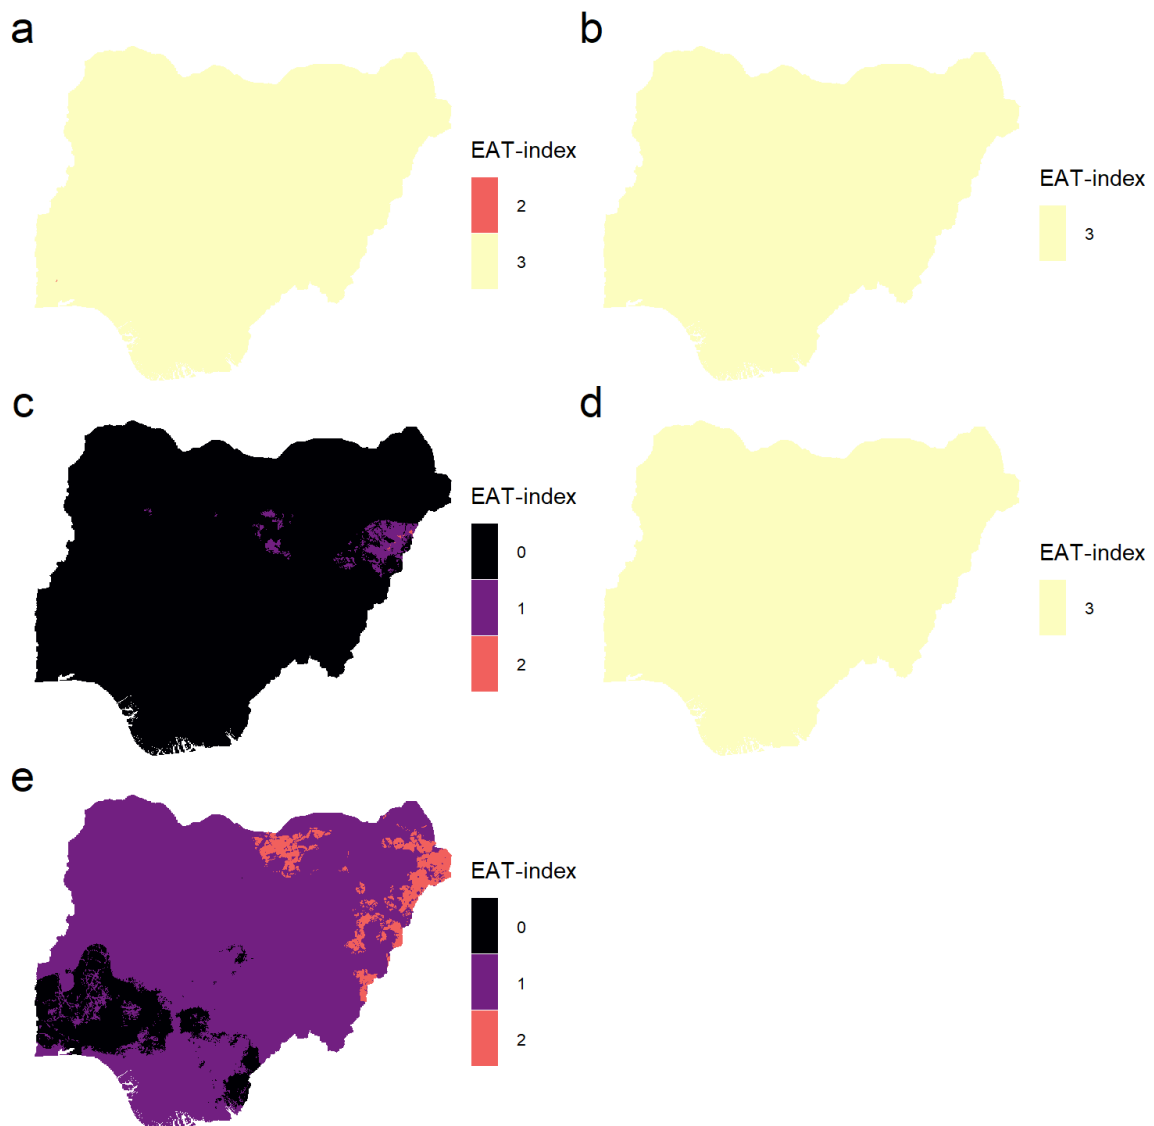

132

133 Supplementary Fig. 24: EAT-Lancet (EAT) index at grid level (30 arcsecond) for eggs (a), dairy (b),  
 134 roots and tubers (c), sweeteners (d), palm oil (e). Per food group the score ranges from 0 to 3 (See  
 135 Supplementary Table 4).

136

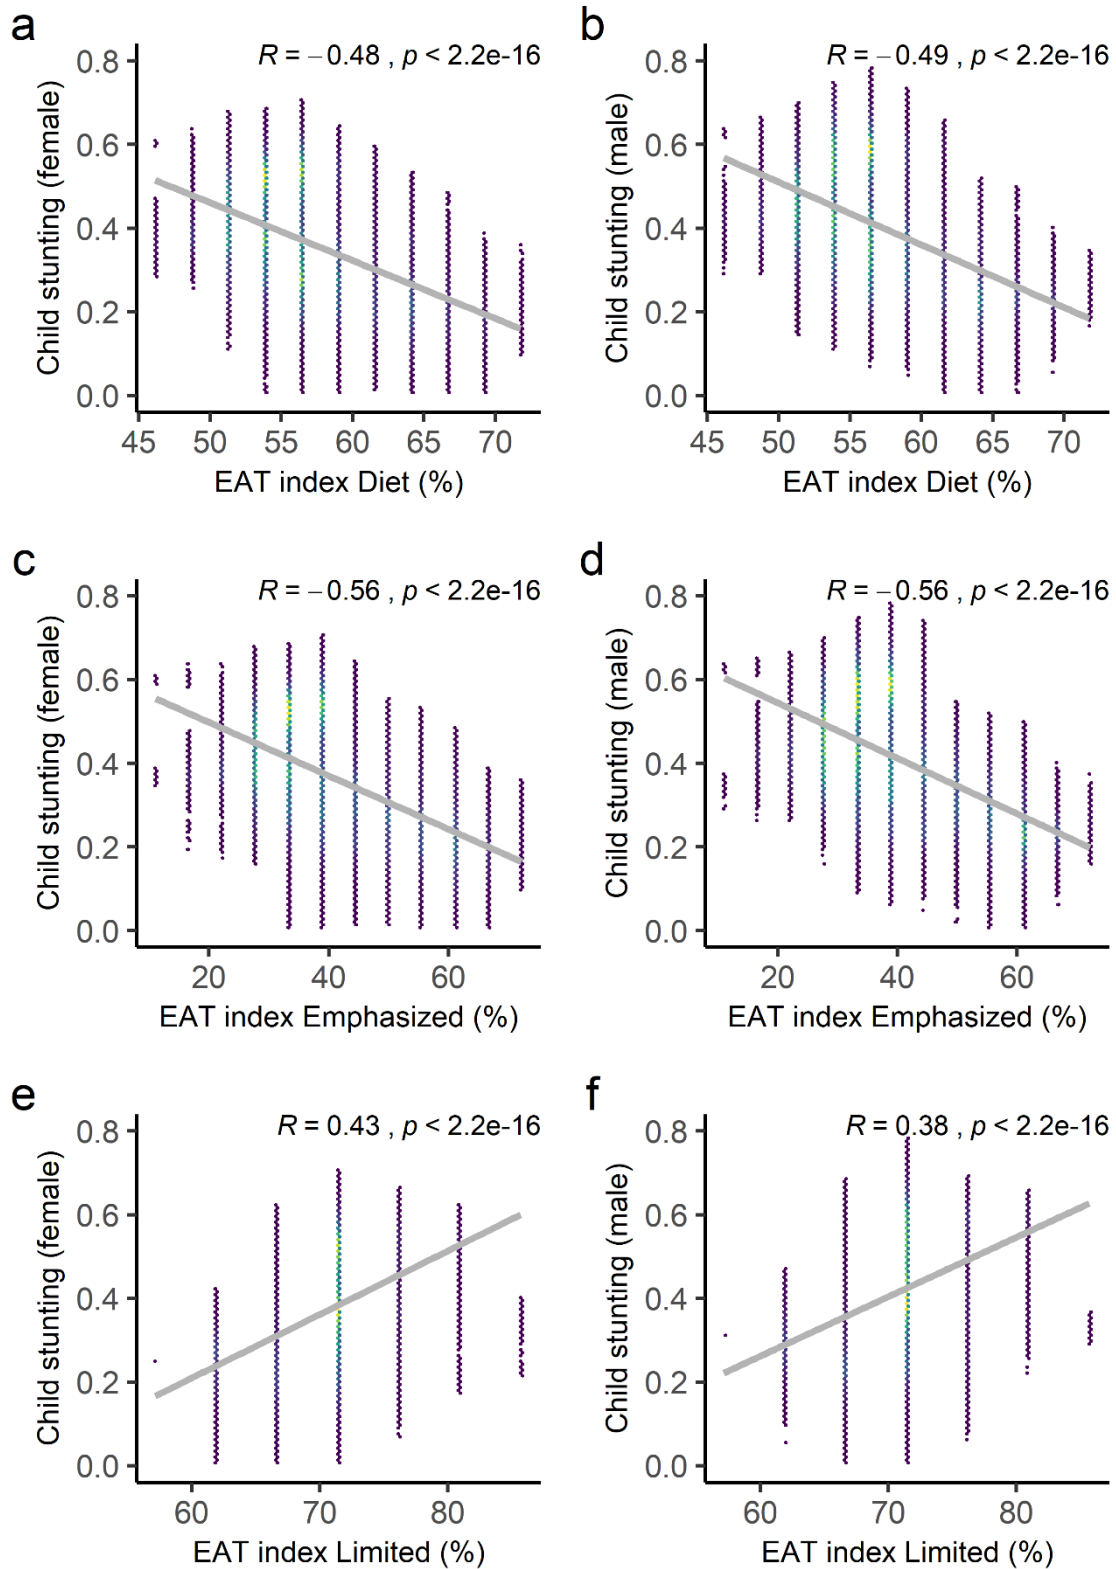

137

138 Supplementary Fig. 25: Scatterplot of proportion of female (a,c,e) and male children (b,d,f) under 5  
 139 years of age classified as stunted from <sup>2</sup> versus the EAT-Lancet Index of the overall diet (a,b), the  
 140 emphasized food group (c,d), and the limited food groups (e,f).

141

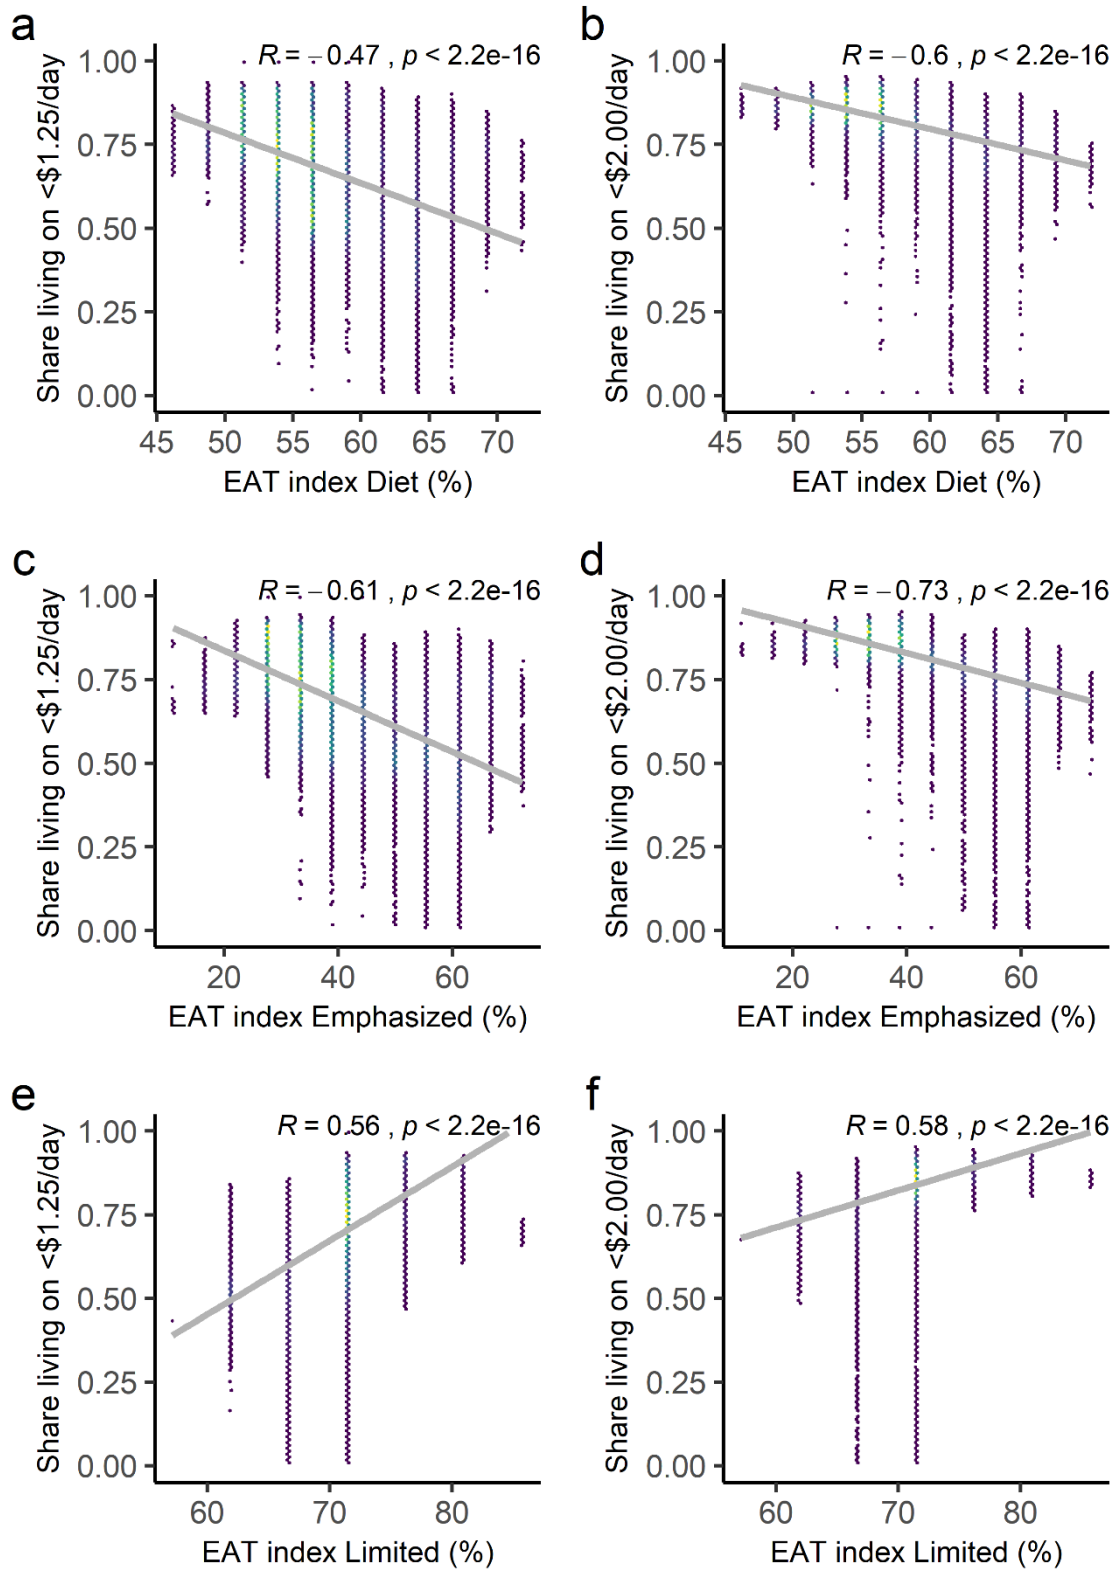

142

143 Supplementary Fig. 26: Scatterplot of share of population living on <\$1.25 a day (a,c,e) and <\$2.00  
 144 a day (b,d,f) from <sup>3</sup> versus the EAT-Lancet Index of the overall diet (a,b), the emphasized food group  
 145 (c,d), and the limited food groups (e,f).

146

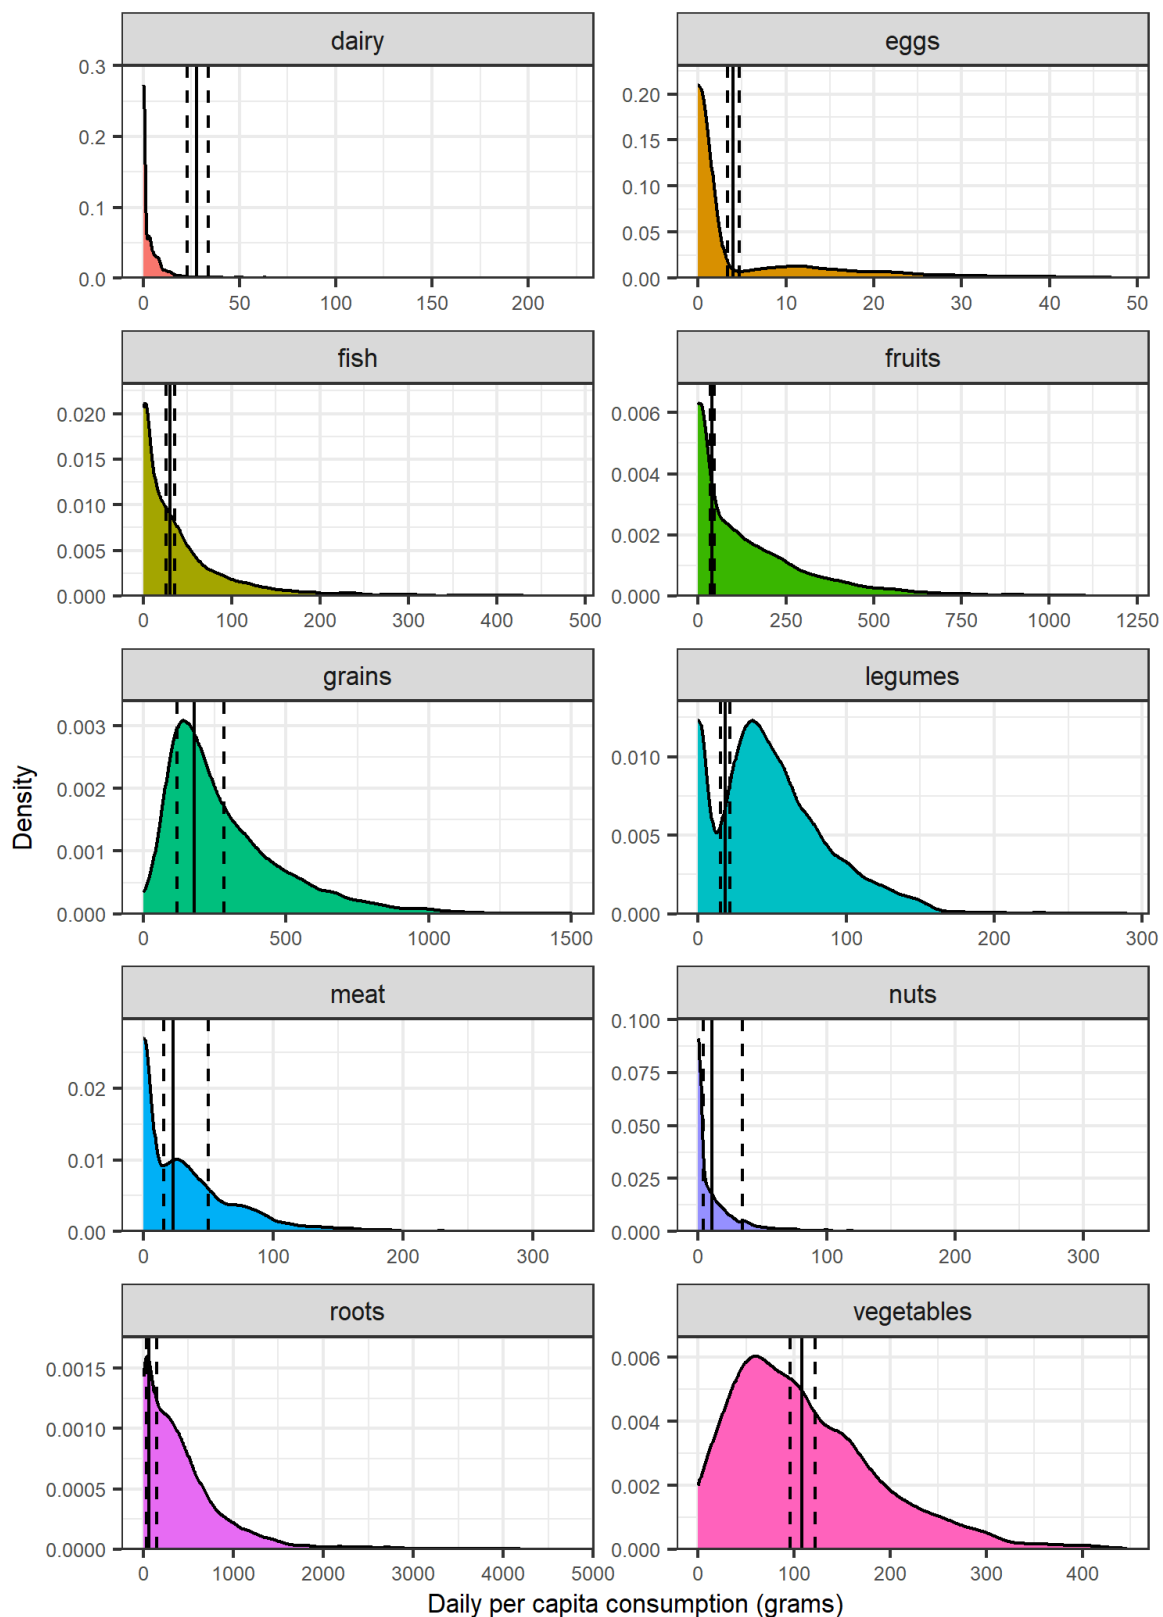

147

148 Supplementary Fig. 27: Distribution of daily per capita consumption (grams) at household level for  
 149 dairy, eggs, fish, fruits, grains, legumes, meat, nuts, roots and vegetables from the LSMS household  
 150 survey data compared with the mean, 95% lower and 95% upper confidence interval from the Global  
 151 Dietary Database (GDD)<sup>4</sup>.

152

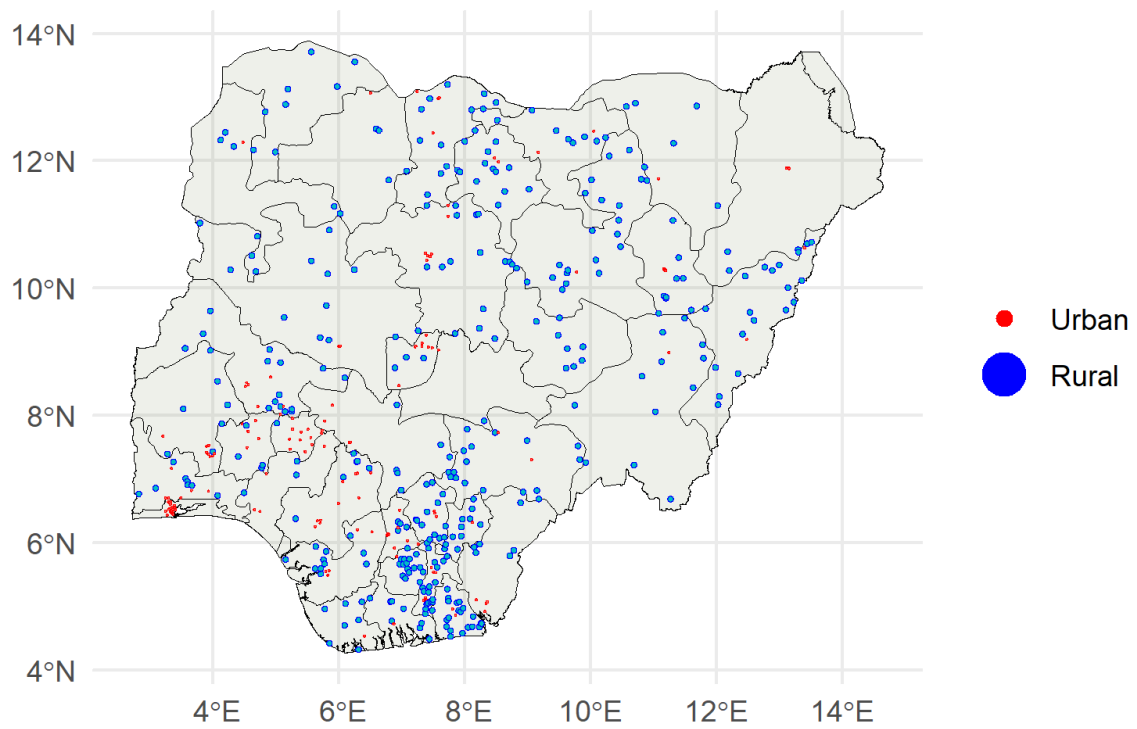

153

154 Supplementary Fig. 28: Locations of the enumeration areas (EAs) as polynomials. The polynomials  
155 of the EAs in urban areas has a radius of 2 km and the polynomials of the EAs in rural areas a radius  
156 of 5 km.

157

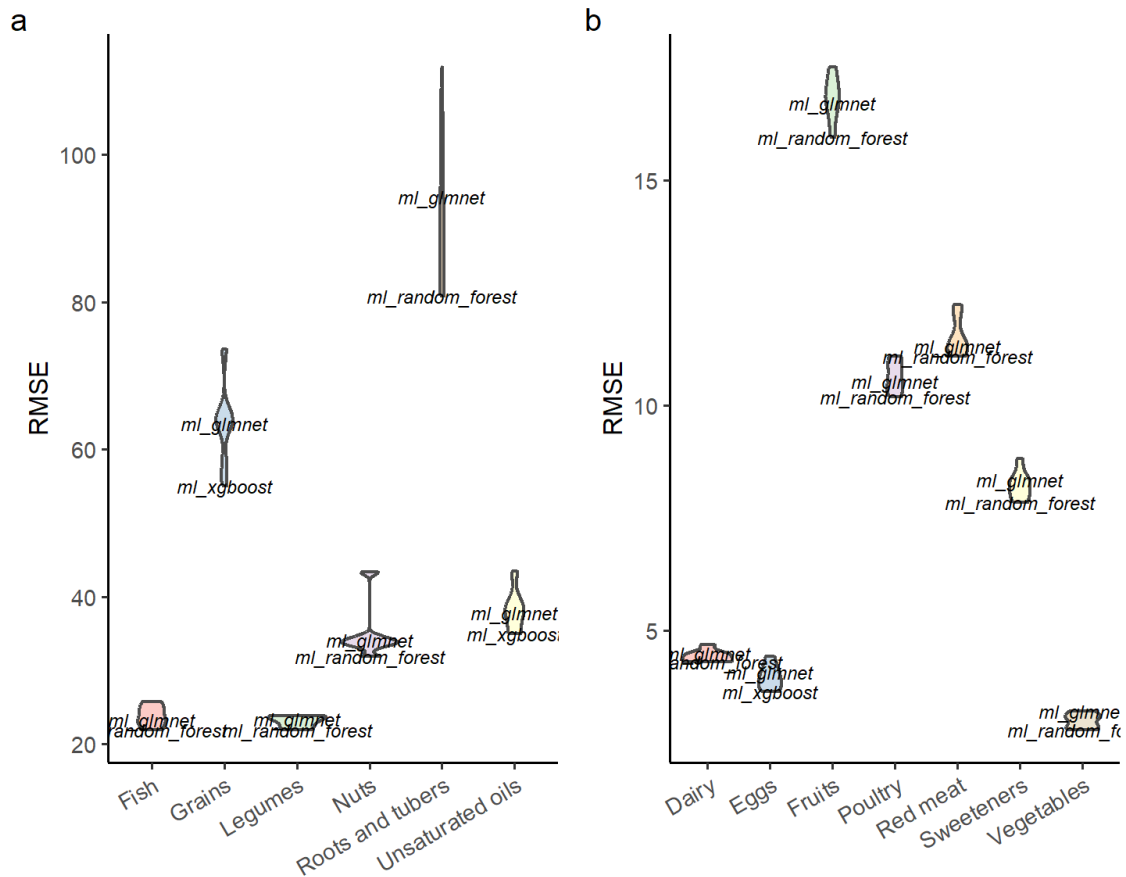

158

159 Supplementary Fig. 29: The root mean squared error (rmse) for the models Support Vector Machine  
 160 (SVM) with RBF kernel, Support Vector Machine (SVM) with polynomial kernel, Neural network,  
 161 Random forest, Extreme Gradient Boosting (XGBoost), K-nearest neighbors (KNN) and Generalized  
 162 Linear Model (GLM) by penalized maximum likelihood for the food groups fish, grains, legumes, nuts,  
 163 roots and tubers, unsaturated oils (a) and dairy, eggs, fruits, poultry, red meat, sweeteners,  
 164 vegetables (b). Only the labels of the models with the lowest RMSE error and the GLM model are  
 165 shown.

166

167

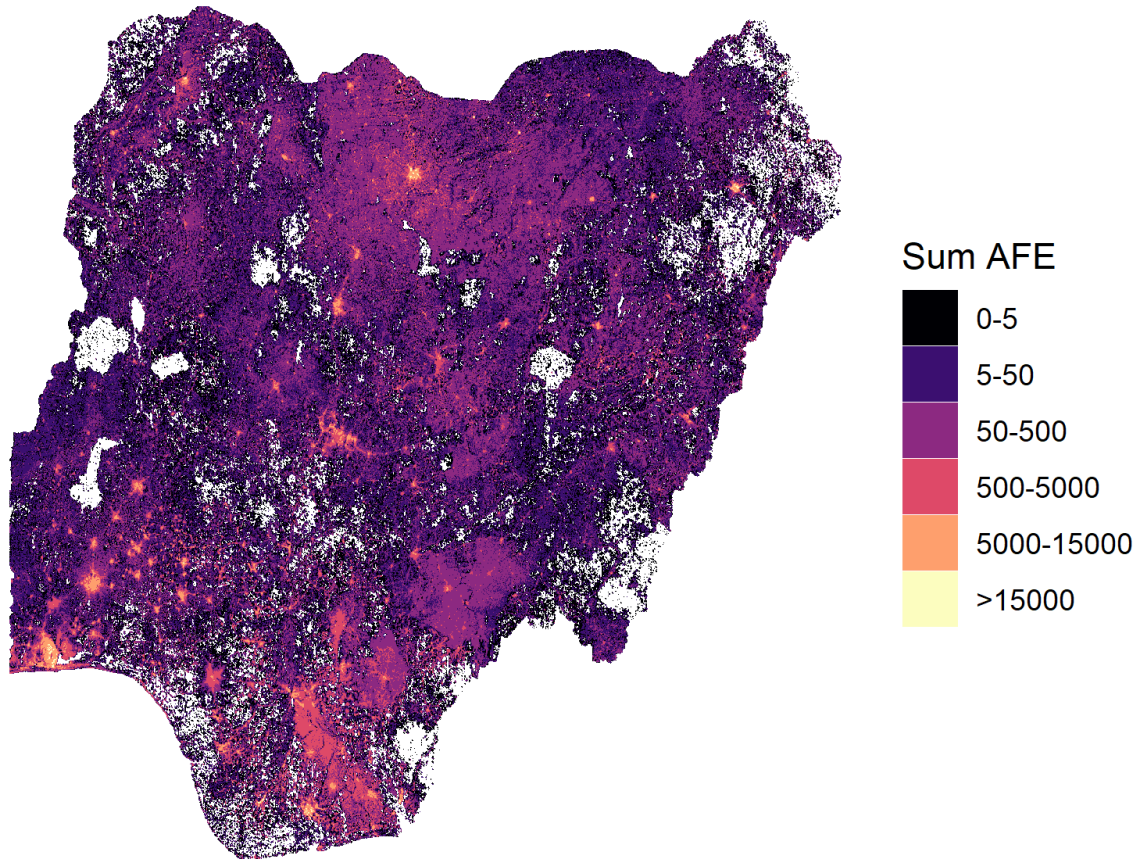

168

169 Supplementary Fig. 30: Sum of Adult Female Equivalent (AFE) per 30 arcsecond (roughly 1 km).

170

171 Supplementary Table 3: List of selected covariates used for the machine learning models.

| Topic          | Predictor variable   | Description                                               | Source                                               |
|----------------|----------------------|-----------------------------------------------------------|------------------------------------------------------|
| Land cover     | dst_coastline        | Distance to open-water coastline 2000-2020                | Worldpop (2018) <sup>5</sup> , worldpop.org          |
| Land cover     | esaccilc_dst_water   | Distance to ESA-CCI-LC inland waters 2000-2012            | Worldpop (2018) <sup>5</sup> , worldpop.org          |
| Land cover     | esalc_11_dst         | Distance to ESA-CCI-LC cultivated area edges 2018         | Woods et al. (2024) <sup>6</sup> , worldpop.org      |
| Land cover     | esalc_40_dst         | Distance to ESA-CCI-LC woody-tree area edges 2018         | Woods et al. (2024) <sup>6</sup> , worldpop.org      |
| Land cover     | esalc_130_dst        | Distance to ESA-CCI-LC shrub area edges 2018              | Woods et al. (2024) <sup>6</sup> , worldpop.org      |
| Land cover     | esalc_140_dst        | Distance to ESA-CCI-LC herbaceous area edges 2018         | Woods et al. (2024) <sup>6</sup> , worldpop.org      |
| Land cover     | esalc_150_dst        | Distance to ESA-CCI-LC sparse vegetation area edges 2018  | Woods et al. (2024) <sup>6</sup> , worldpop.org      |
| Land cover     | esalc_160_dst        | Distance to ESA-CCI-LC aquatic vegetation area edges 2018 | Woods et al. (2024) <sup>6</sup> , worldpop.org      |
| Land cover     | esalc_200_dst        | Distance to ESA-CCI-LC bare area edges 2018               | Woods et al. (2024) <sup>6</sup> , worldpop.org      |
| Topography     | srtm_slope           | SRTM slope 2000                                           | Worldpop (2018) <sup>5</sup> , worldpop.org          |
| Topography     | srtm_topo            | SRTM elevation 2000                                       | Worldpop (2018) <sup>5</sup> , worldpop.org          |
| Infrastructure | osm_dst_road         | Distance to OSM major roads 2016                          | Worldpop (2018) <sup>5</sup> , worldpop.org          |
| Infrastructure | osm_dst_roadintersec | Distance to OSM major roads intersections 2016            | Worldpop (2018) <sup>5</sup> , worldpop.org          |
| Infrastructure | osm_dst_waterway     | Distance to OSM major water ways 2016                     | Worldpop (2018) <sup>5</sup> , worldpop.org          |
| Urbanisation   | esalc_dst190         | Distance to ESA-CCI-LC artificial surface edges 2018      | Woods et al. (2024) <sup>6</sup> , worldpop.org      |
| Urbanisation   | travel_time          | Travel time to major cities 2015                          | Woods et al. (2024) <sup>6</sup> , worldpop.org      |
| Urbanisation   | built-up surface     | Built-up surface 2018                                     | Woods et al. (2024) <sup>6</sup> , worldpop.org      |
| Urbanisation   | built-up volume      | Built-up volume 2018                                      | Woods et al. (2024) <sup>6</sup> , worldpop.org      |
| Climate        | bio_1                | Annual mean temperature                                   | Fick and Hijmans (2017) <sup>7</sup> , worldclim.org |
| Climate        | bio_5                | Max temperature of warmest month                          | Fick and Hijmans (2017) <sup>7</sup> , worldclim.org |
| Climate        | bio_6                | Min temperature of coldest month                          | Fick and Hijmans (2017) <sup>7</sup> , worldclim.org |
| Climate        | bio_12               | Annual precipitation                                      | Fick and Hijmans (2017) <sup>7</sup> , worldclim.org |
| Religion       | side_v1_198_1        | Catholic (share of population) 2013                       | Müller-Crepon et al. (2018) <sup>8</sup>             |
| Religion       | side_v1_198_2        | Islam (share of population) 2013                          | Müller-Crepon et al. (2018) <sup>8</sup>             |
| Religion       | side_v1_198_4        | Other Christian (share of population) 2013                | Müller-Crepon et al. (2018) <sup>8</sup>             |
| Ethnicity      | side_v1_197_1        | Annang (share of population) 2013                         | Müller-Crepon et al. (2018) <sup>8</sup>             |
| Ethnicity      | side_v1_197_2        | Bini/Edo (share of population) 2013                       | Müller-Crepon et al. (2018) <sup>8</sup>             |

172 Supplementary Table 3: List of selected covariates used for the machine learning models, continued

| Topic     | Predictor variable | Description                               | Source                                   |
|-----------|--------------------|-------------------------------------------|------------------------------------------|
| Ethnicity | side_v1_197_3      | Ebira/Igbira (share of population) 2013   | Müller-Crepon et al. (2018) <sup>8</sup> |
| Ethnicity | side_v1_197_4      | Esan (share of population) 2013           | Müller-Crepon et al. (2018) <sup>8</sup> |
| Ethnicity | side_v1_197_5      | Fulani (share of population) 2013         | Müller-Crepon et al. (2018) <sup>8</sup> |
| Ethnicity | side_v1_197_6      | Fulfulde (share of population) 2013       | Müller-Crepon et al. (2018) <sup>8</sup> |
| Ethnicity | side_v1_197_7      | Gbaju/Gbagi (share of population) 2013    | Müller-Crepon et al. (2018) <sup>8</sup> |
| Ethnicity | side_v1_197_8      | Hausa (share of population) 2013          | Müller-Crepon et al. (2018) <sup>8</sup> |
| Ethnicity | side_v1_197_9      | Ibidio (share of population) 2013         | Müller-Crepon et al. (2018) <sup>8</sup> |
| Ethnicity | side_v1_197_10     | Idoma (share of population) 2013          | Müller-Crepon et al. (2018) <sup>8</sup> |
| Ethnicity | side_v1_197_11     | Igala (share of population) 2013          | Müller-Crepon et al. (2018) <sup>8</sup> |
| Ethnicity | side_v1_197_12     | Igbo/Ibo (share of population) 2013       | Müller-Crepon et al. (2018) <sup>8</sup> |
| Ethnicity | side_v1_197_13     | Ijaw/Izon (share of population) 2013      | Müller-Crepon et al. (2018) <sup>8</sup> |
| Ethnicity | side_v1_197_14     | Kambari (share of population) 2013        | Müller-Crepon et al. (2018) <sup>8</sup> |
| Ethnicity | side_v1_197_15     | Kanuri/Berberi (share of population) 2013 | Müller-Crepon et al. (2018) <sup>8</sup> |
| Ethnicity | side_v1_197_16     | Mumuye (share of population) 2013         | Müller-Crepon et al. (2018) <sup>8</sup> |
| Ethnicity | side_v1_197_17     | Nupe (share of population) 2013           | Müller-Crepon et al. (2018) <sup>8</sup> |
| Ethnicity | side_v1_197_18     | Ogoni (share of population) 2013          | Müller-Crepon et al. (2018) <sup>8</sup> |
| Ethnicity | side_v1_197_19     | Other (share of population) 2013          | Müller-Crepon et al. (2018) <sup>8</sup> |
| Ethnicity | side_v1_197_20     | Tarok (share of population) 2013          | Müller-Crepon et al. (2018) <sup>8</sup> |
| Ethnicity | side_v1_197_21     | Tiv (share of population) 2013            | Müller-Crepon et al. (2018) <sup>8</sup> |
| Ethnicity | side_v1_197_22     | Urhobo (share of population) 2013         | Müller-Crepon et al. (2018) <sup>8</sup> |
| Ethnicity | side_v1_197_23     | Wurkum (share of population) 2013         | Müller-Crepon et al. (2018) <sup>8</sup> |
| Ethnicity | side_v1_197_24     | Yoruba (share of population) 2013         | Müller-Crepon et al. (2018) <sup>8</sup> |

173 Note: We applied feature engineering on the dataset prior to running the machine learning models whereby covariates  
 174 correlated with other covariates with 0.9 or higher were removed from the dataset. This resulted in the covariates Built-up  
 175 surface 2018, built-up volume 2018 and Distance to open-water coast-line 2000-2020 were removed from the dataset.

176

177 Supplementary Table 4: The EAT-Lancet Index criteria per EAT-Lancet food group to evaluate diet  
 178 quality.

| <b>Food group</b> | <b>EAT-Lancet target intake (Kcal per day)</b> | <b>3</b> | <b>2</b>      | <b>1</b>        | <b>0</b> |
|-------------------|------------------------------------------------|----------|---------------|-----------------|----------|
| Vegetables        | 78                                             | >78      | 29-78         | 19.5-39         | <19.5    |
| Fruits            | 126                                            | >126     | 63-126        | 31.5-63         | <31.5    |
| Unsaturated oils  | 354                                            | >354     | 177-354       | 88.5-177        | <88.5    |
| Legumes           | 284                                            | >284     | 142-284       | 71-142          | <71      |
| Nuts              | 291                                            | >291     | 145.5-<br>291 | 72.75-<br>145.5 | <72.75   |
| Fish              | 40                                             | >40      | 20-40         | 10-20           | <10      |
| Red meat          | 30                                             | <30      | 30-60         | 60-120          | >120     |
| Poultry           | 62                                             | <62      | 62-124        | 124-248         | >248     |
| Eggs              | 19                                             | <19      | 19-38         | 38-76           | >76      |
| Dairy             | 153                                            | <153     | 135-306       | 306-612         | >612     |
| Roots and tubers  | 39                                             | <39      | 39-78         | 78-156          | >156     |
| Sweeteners        | 120                                            | <120     | 120-240       | 240-480         | >480     |
| Palm oil          | 60                                             | <60      | 60-120        | 120-240         | >240     |

179 Note: In this study we made minor modifications to the EAT-Lancet index<sup>9</sup>. We converted the target intake in grams to kcal  
 180 based on the energy targets Table 1 from Food in the Anthropocene: the EAT–Lancet Commission on healthy diets from  
 181 sustainable food systems<sup>1</sup>. In addition, we grouped beef, lamb, and pork together as red meat. We included palm oil as an  
 182 extra food group, while whole grain was excluded from the EAT index because the household survey data does not indicate  
 183 whether the consumed grains are whole or refined.

184

185 **References**

- 186 1. Willett, W. *et al.* Food in the Anthropocene: the EAT–Lancet Commission on healthy diets from  
187 sustainable food systems. *The Lancet* **393**, 447–492 (2019).
- 188 2. Bosco, C. *et al.* Exploring the high-resolution mapping of gender-disaggregated development  
189 indicators. *J. R. Soc. Interface.* **14**, 20160825 (2017).
- 190 3. Tatem, A., Gething, P., Bhatt, S., Weiss, D. & Pezzulo, C. Pilot high resolution poverty maps.  
191 University of Southampton/Oxford <https://doi.org/10.5258/SOTON/WP00200> (2013).
- 192 4. Miller, V. *et al.* Global dietary quality in 185 countries from 1990 to 2018 show wide differences by  
193 nation, age, education, and urbanicity. *Nat Food* **3**, 694–702 (2022).
- 194 5. WorldPop. Global 100m Covariates. University of Southampton  
195 <https://doi.org/10.5258/SOTON/WP00644> (2018).
- 196 6. Woods, T. *et al.* WorldPop high resolution, harmonised annual global geospatial covariates.  
197 Version 1.0. University of Southampton <https://doi.org/10.5258/SOTON/WP00772> (2025).
- 198 7. Fick, S. E. & Hijmans, R. J. WorldClim 2: new 1-km spatial resolution climate surfaces for global  
199 land areas. *Intl Journal of Climatology* **37**, 4302–4315 (2017).
- 200 8. Müller-Crepon, C. & Hunziker, P. New spatial data on ethnicity: Introducing SIDE. *Journal of Peace*  
201 *Research* **55**, 687–698 (2018).
- 202 9. Stubbendorff, A. *et al.* Development of an EAT-Lancet index and its relation to mortality in a  
203 Swedish population. *The American Journal of Clinical Nutrition* **115**, 705–716 (2022).

204
